# Supplementary material for: 5-Azadibenzo[a,g]corannulene
Source: Royal Society of Chemistry journal article supplement (doi:10.1039/c6qo00831c), 2017-01-01
Supplement: c6qo00831c1.pdf [file c6qo00831c1.pdf]

## 5-Azadibenzo[*a,g*]corannulene

V. M. Tsefrikas, A. K. Greene and L. T. Scott\*

Electronic Supplementary Information

|                                                                                                                                                                                          |              |
|------------------------------------------------------------------------------------------------------------------------------------------------------------------------------------------|--------------|
| NMR spectra of compounds <b>6</b> , <b>9</b> , <b>10</b> , <b>11</b> , <b>12</b> , <b>13a</b> , <b>13b</b> , <b>14a</b> , <b>14b</b> , <b>15</b> , <b>18</b> , <b>20</b> , and <b>22</b> | pages S2-S27 |
| Figure ESI 1. UV-VIS spectra of 5-azadibenzo[ <i>a,g</i> ]corannulene ( <b>6</b> ) before and after acid addition                                                                        | page S28     |
| Figure ESI 2. UV-VIS spectra of 5-azadibenzo[ <i>a,g</i> ]corannulene ( <b>6</b> ) plus acid plus base                                                                                   | page S28     |

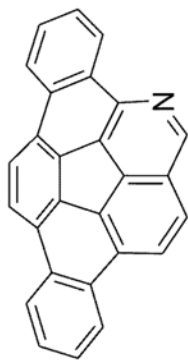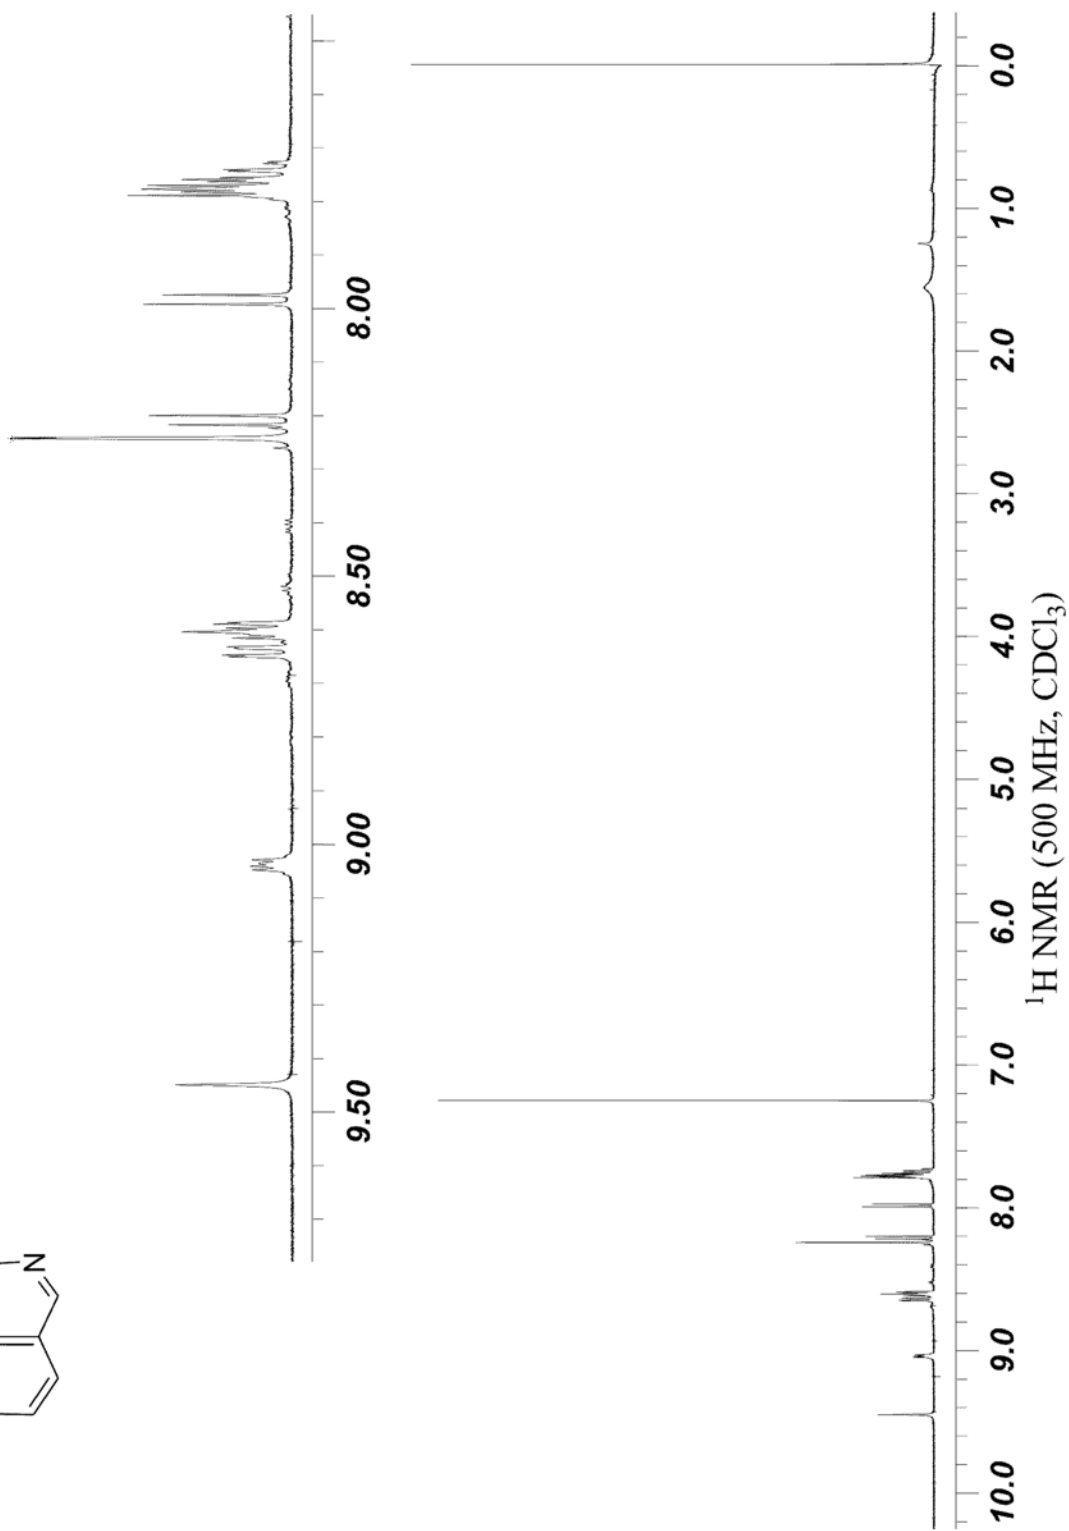

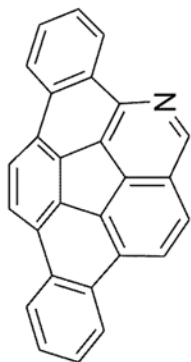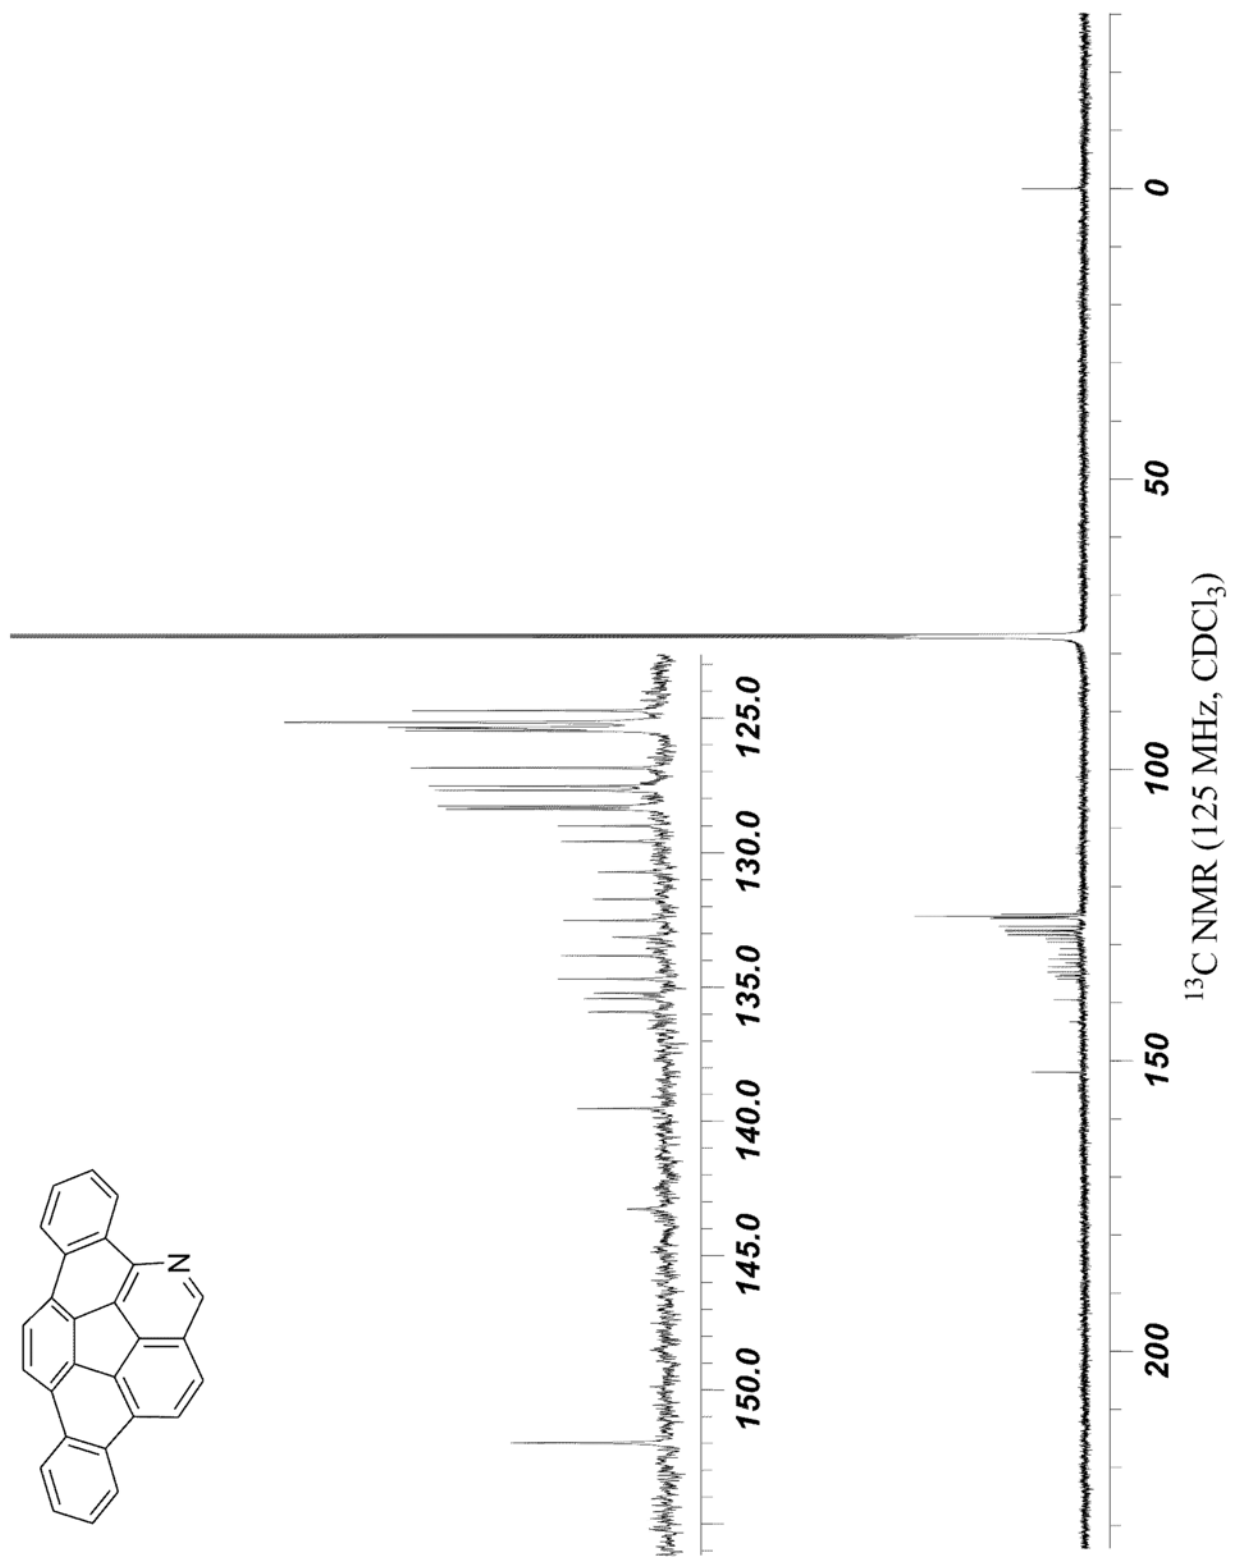

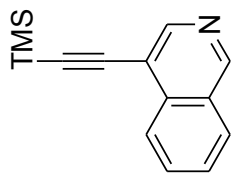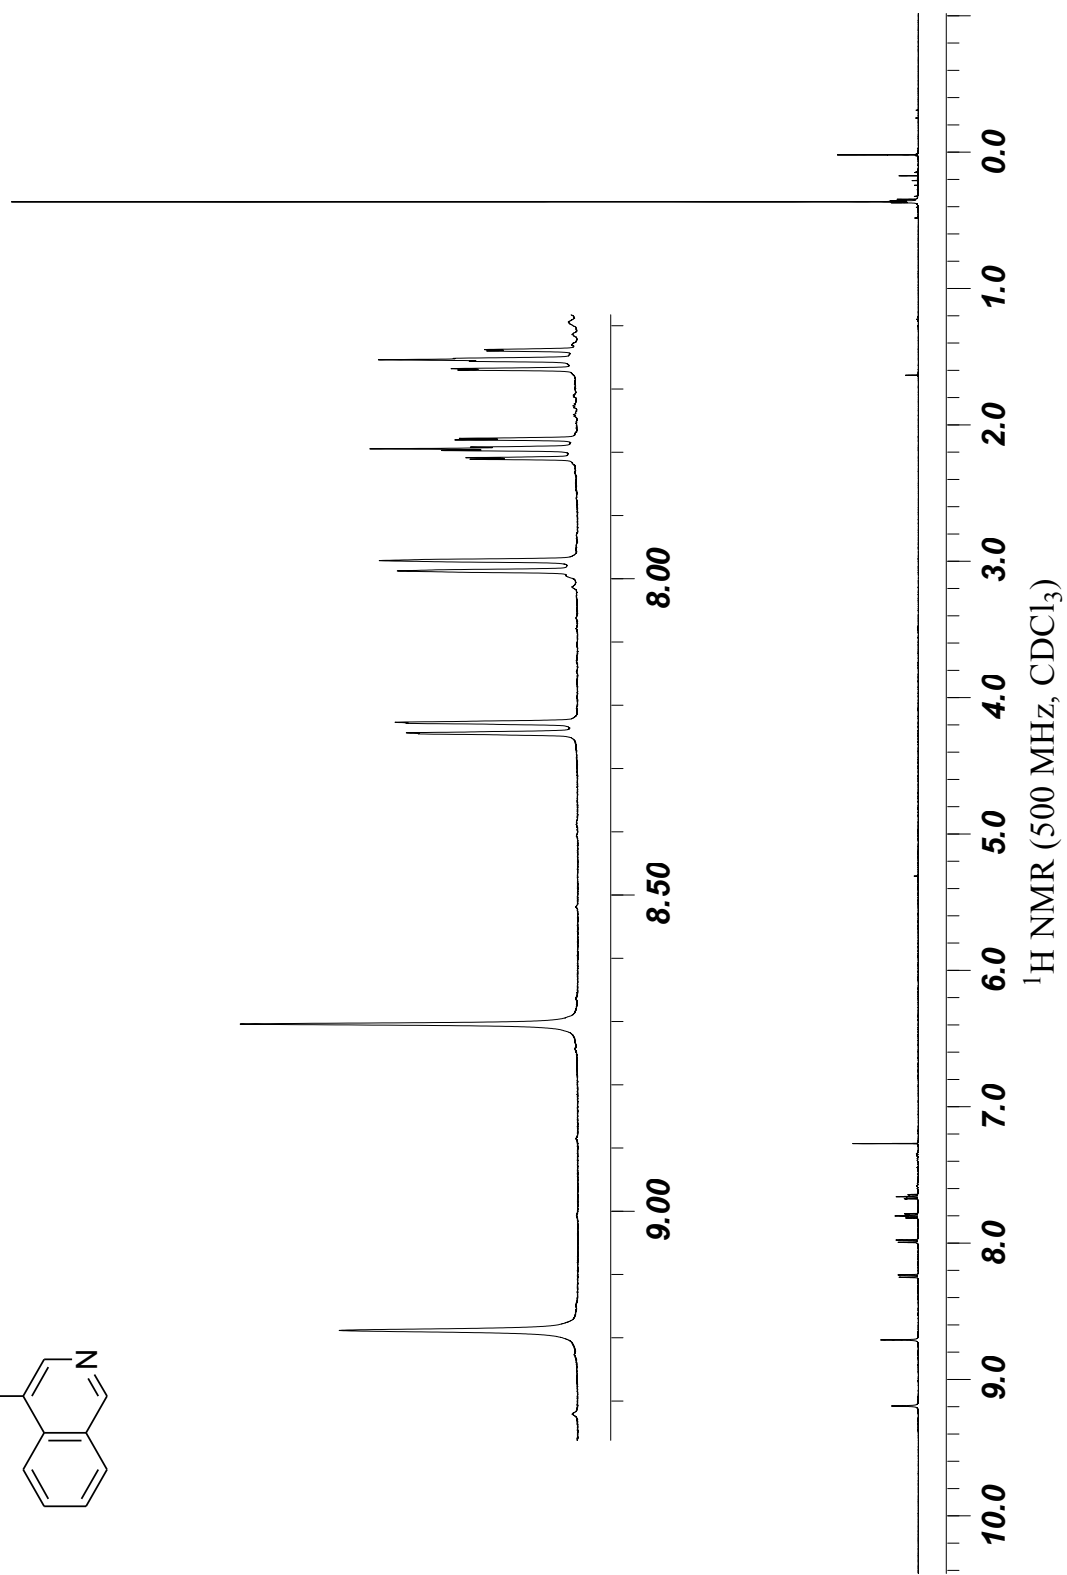

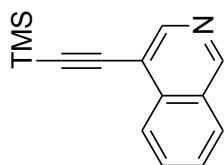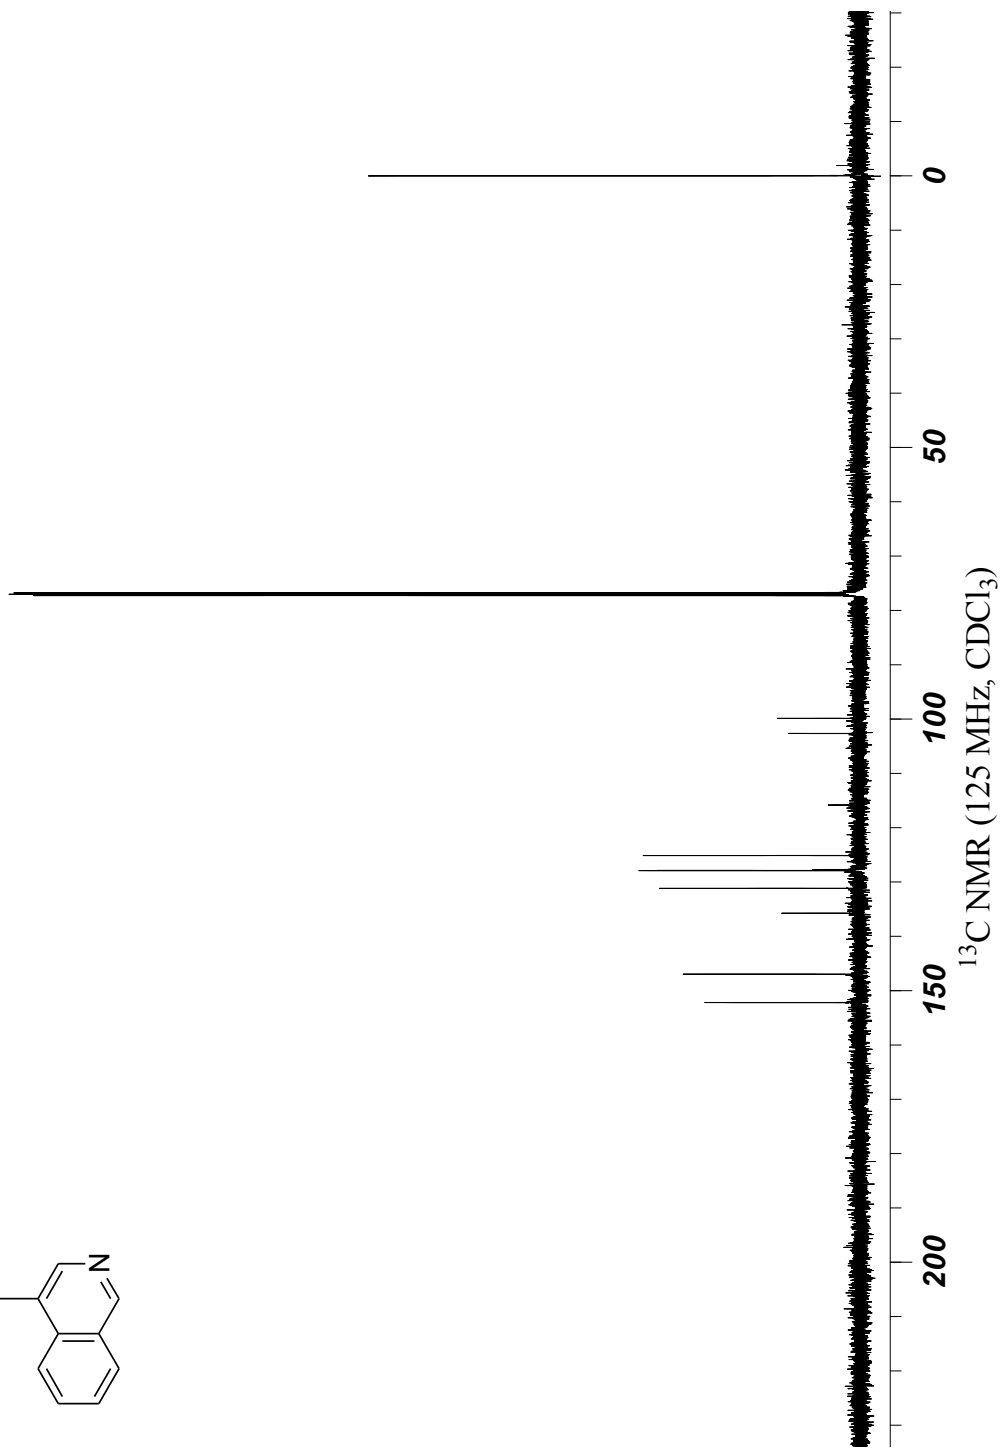

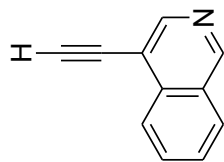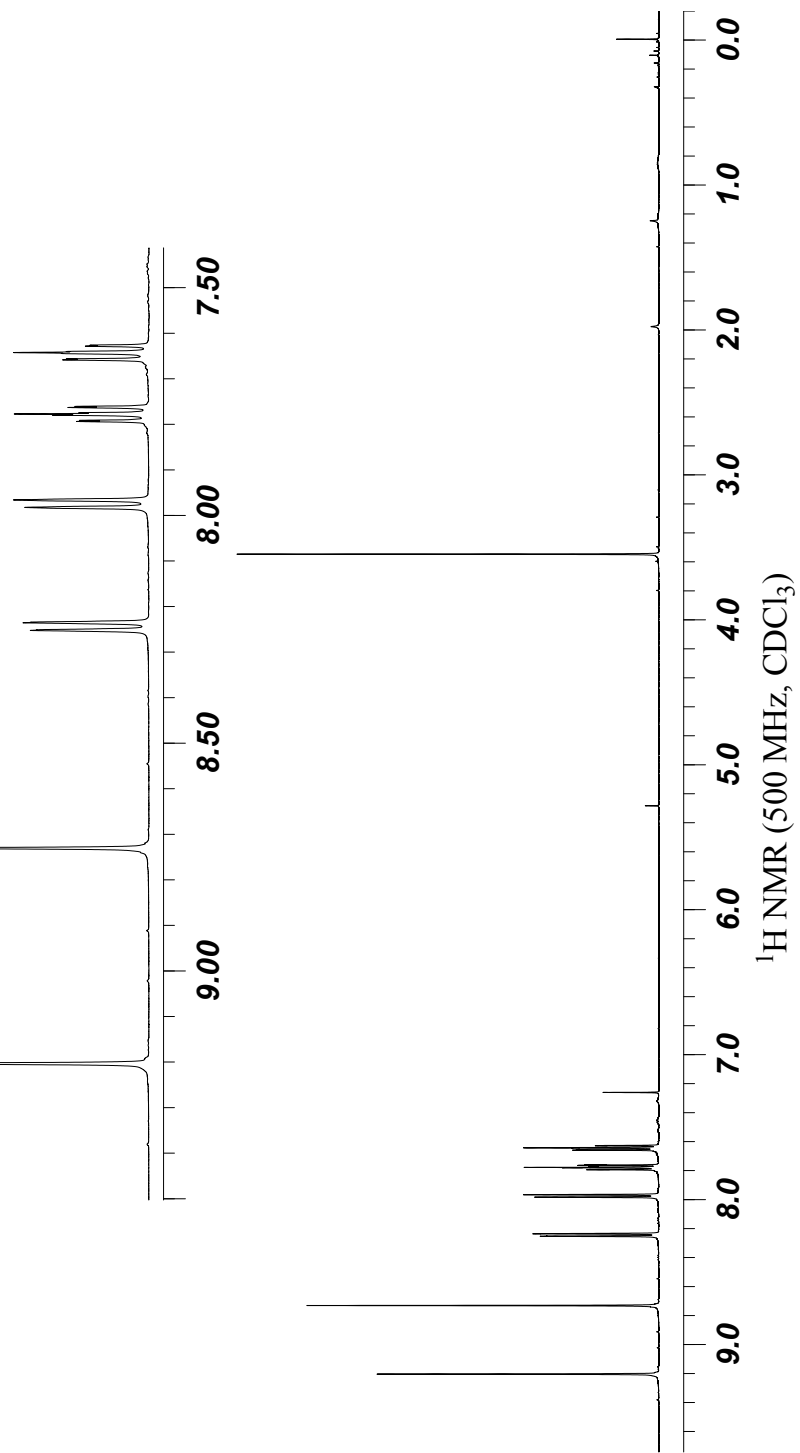

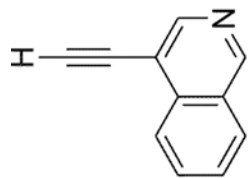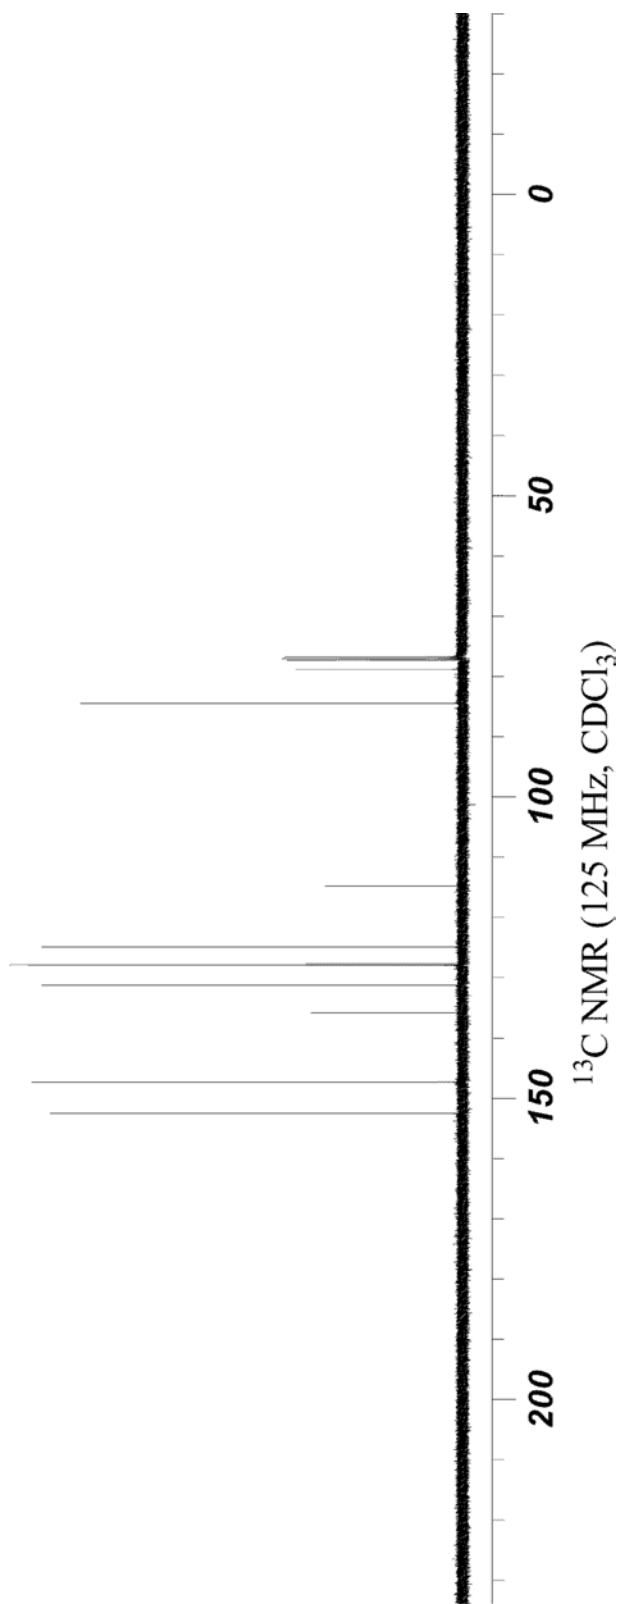

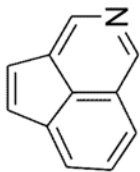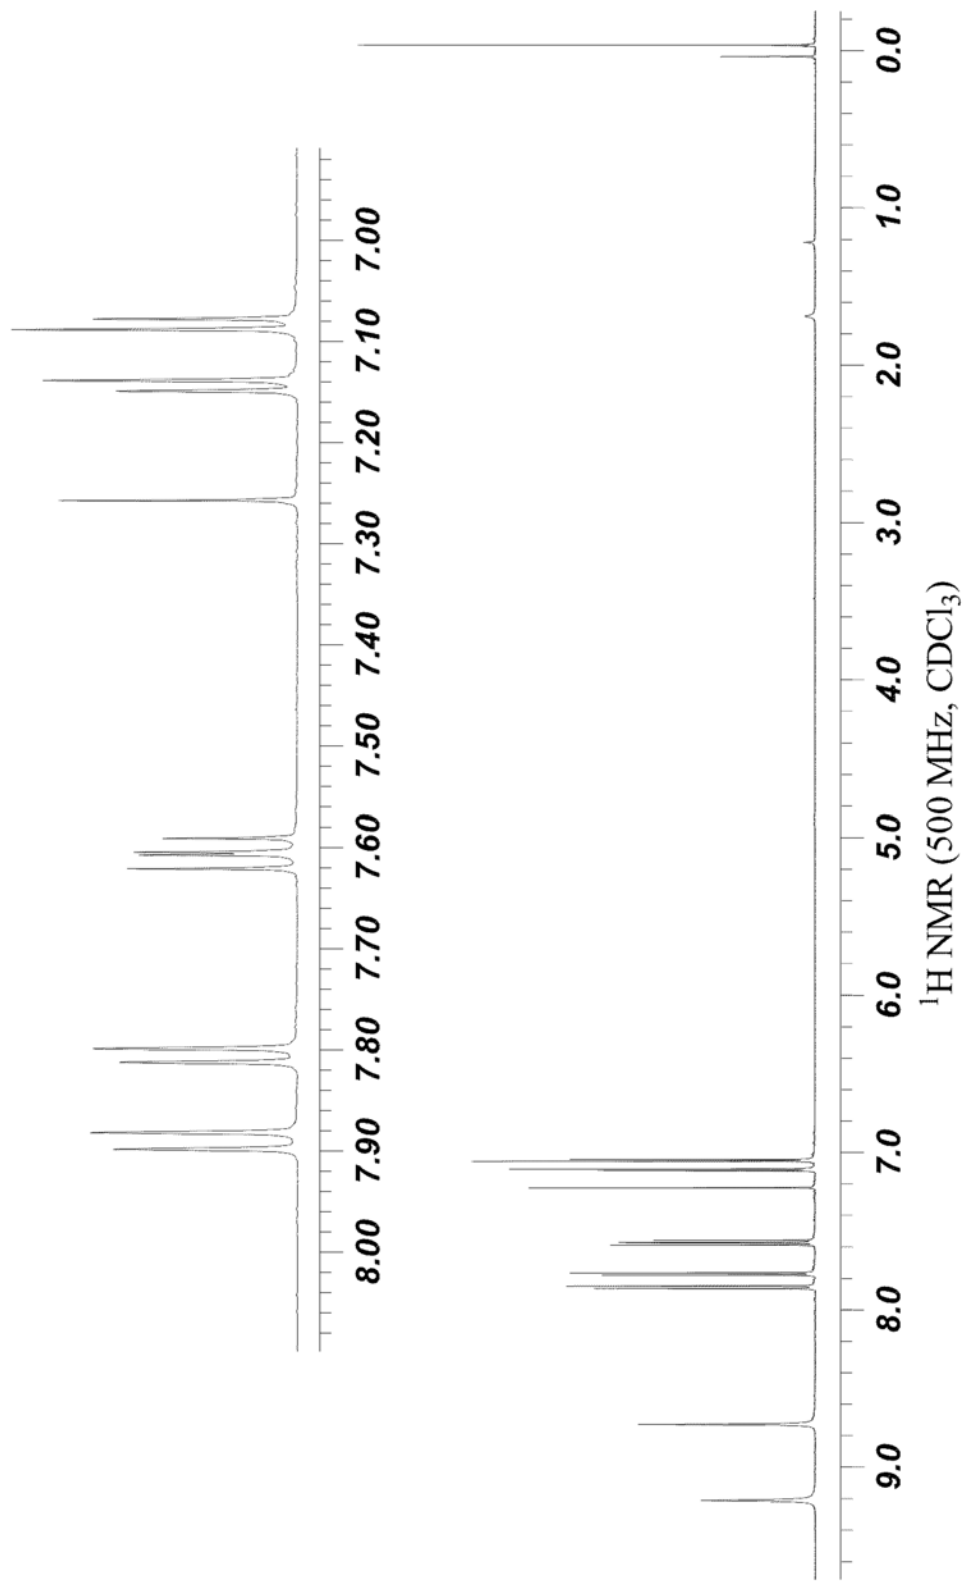



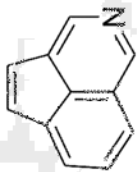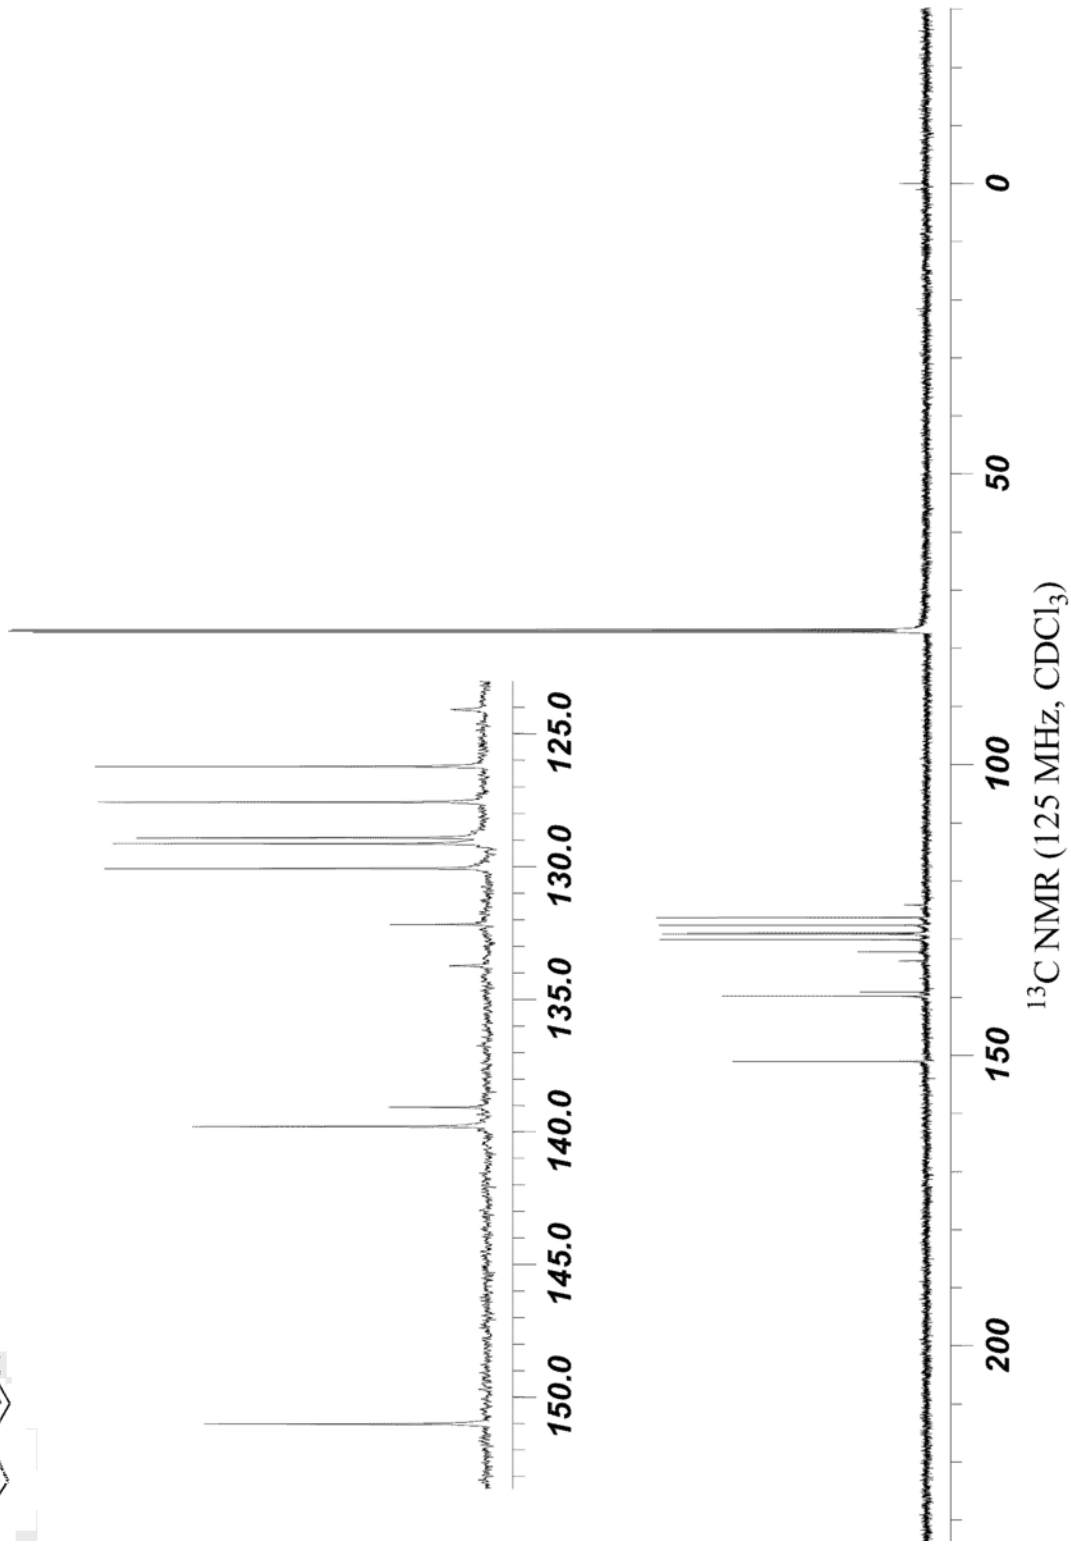

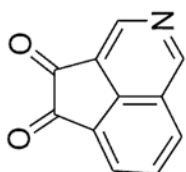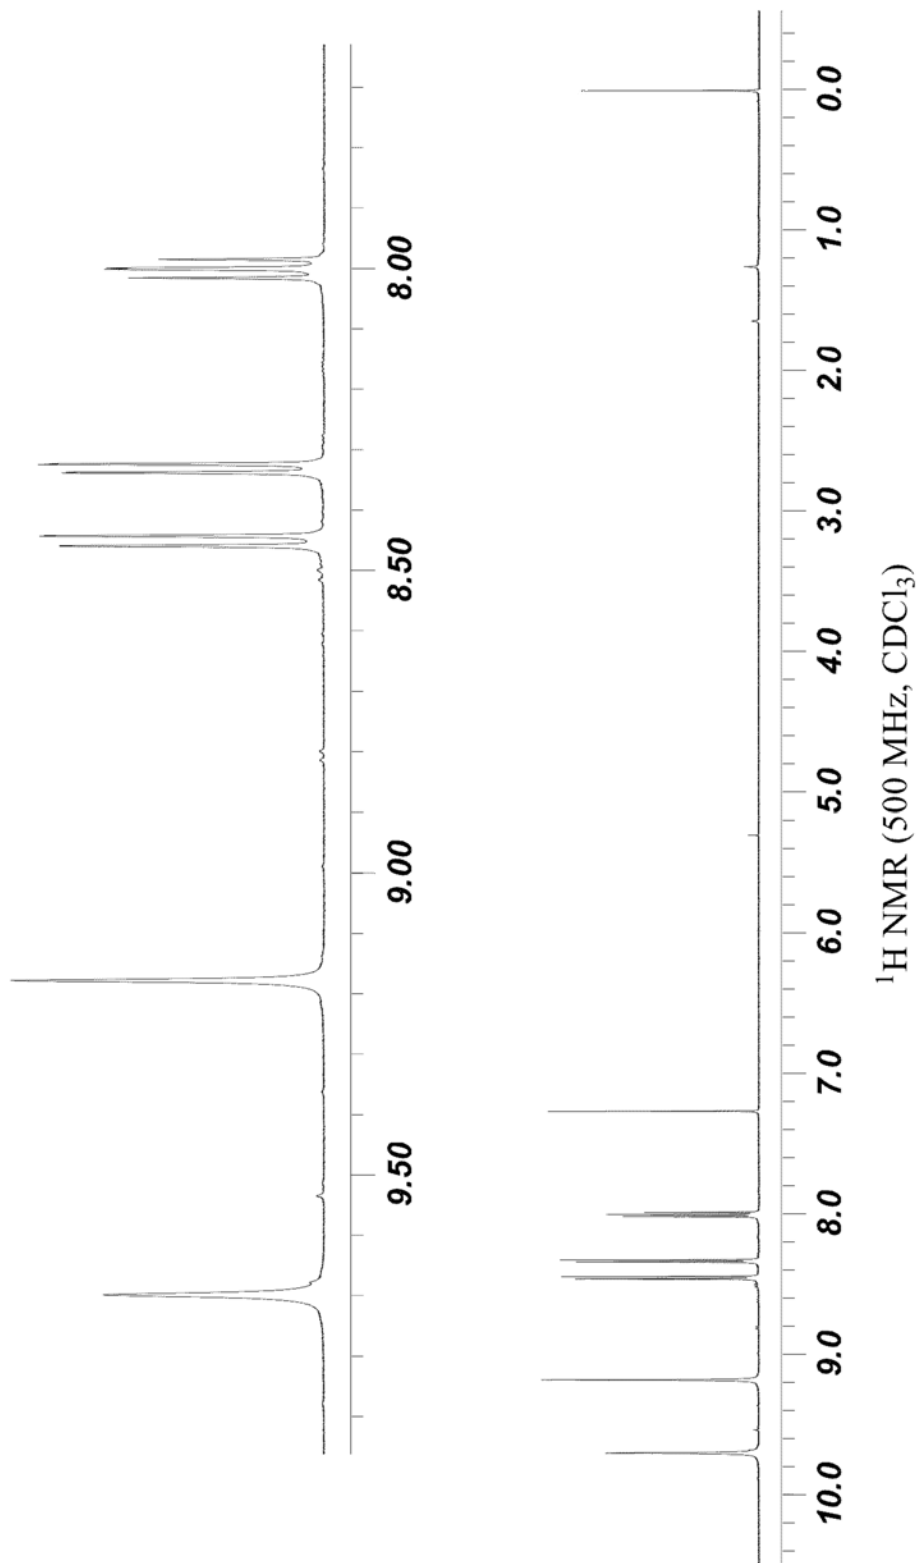

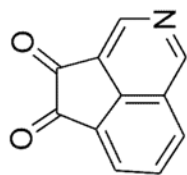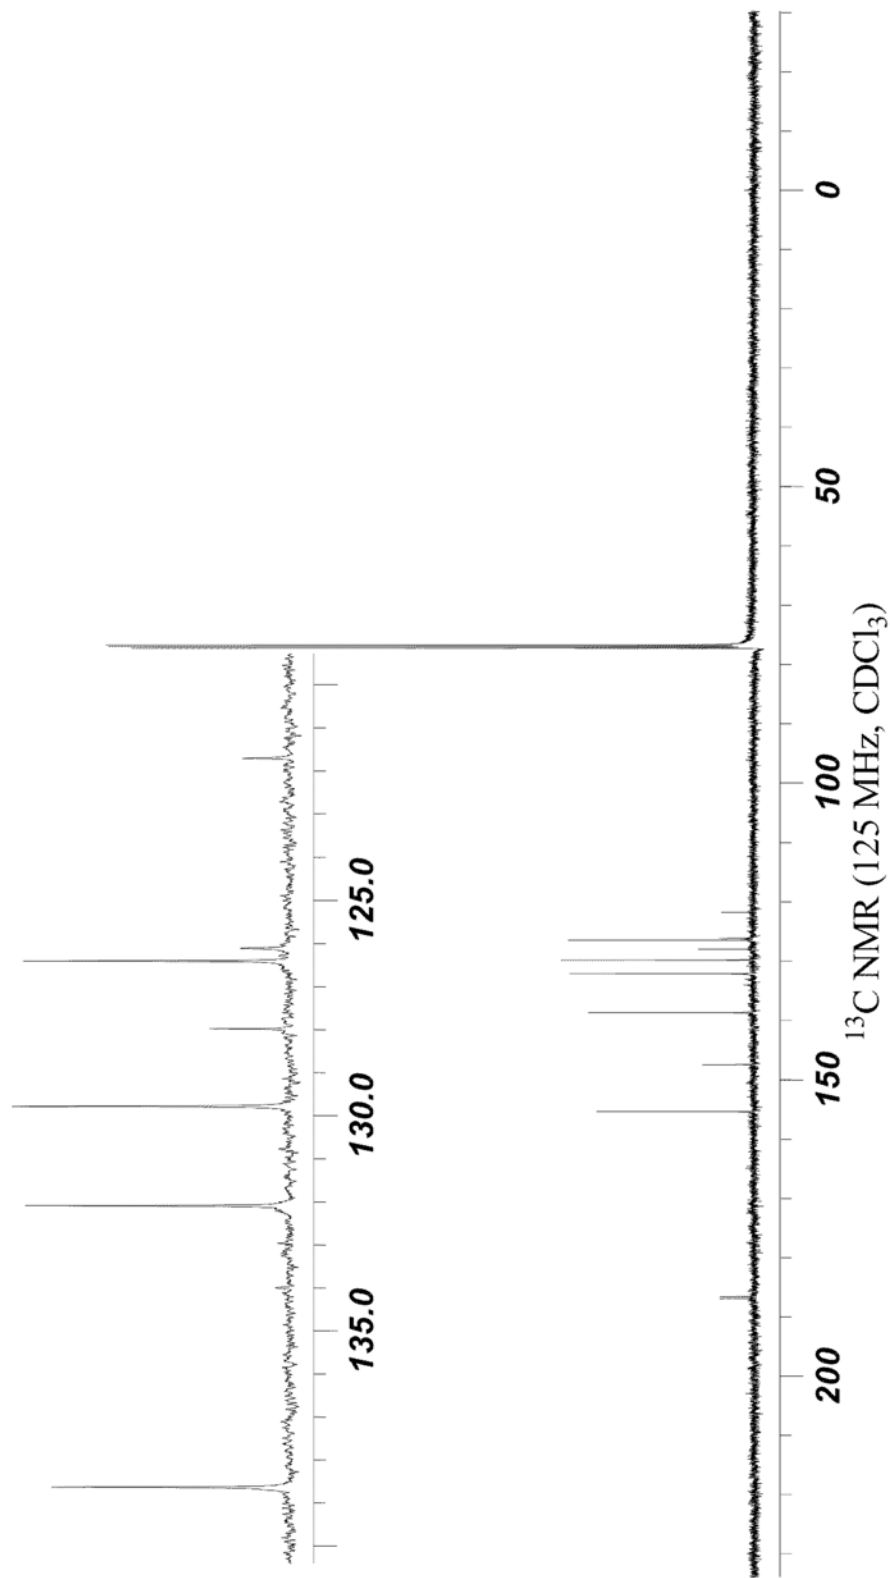

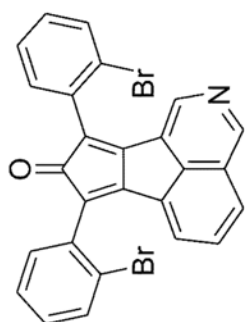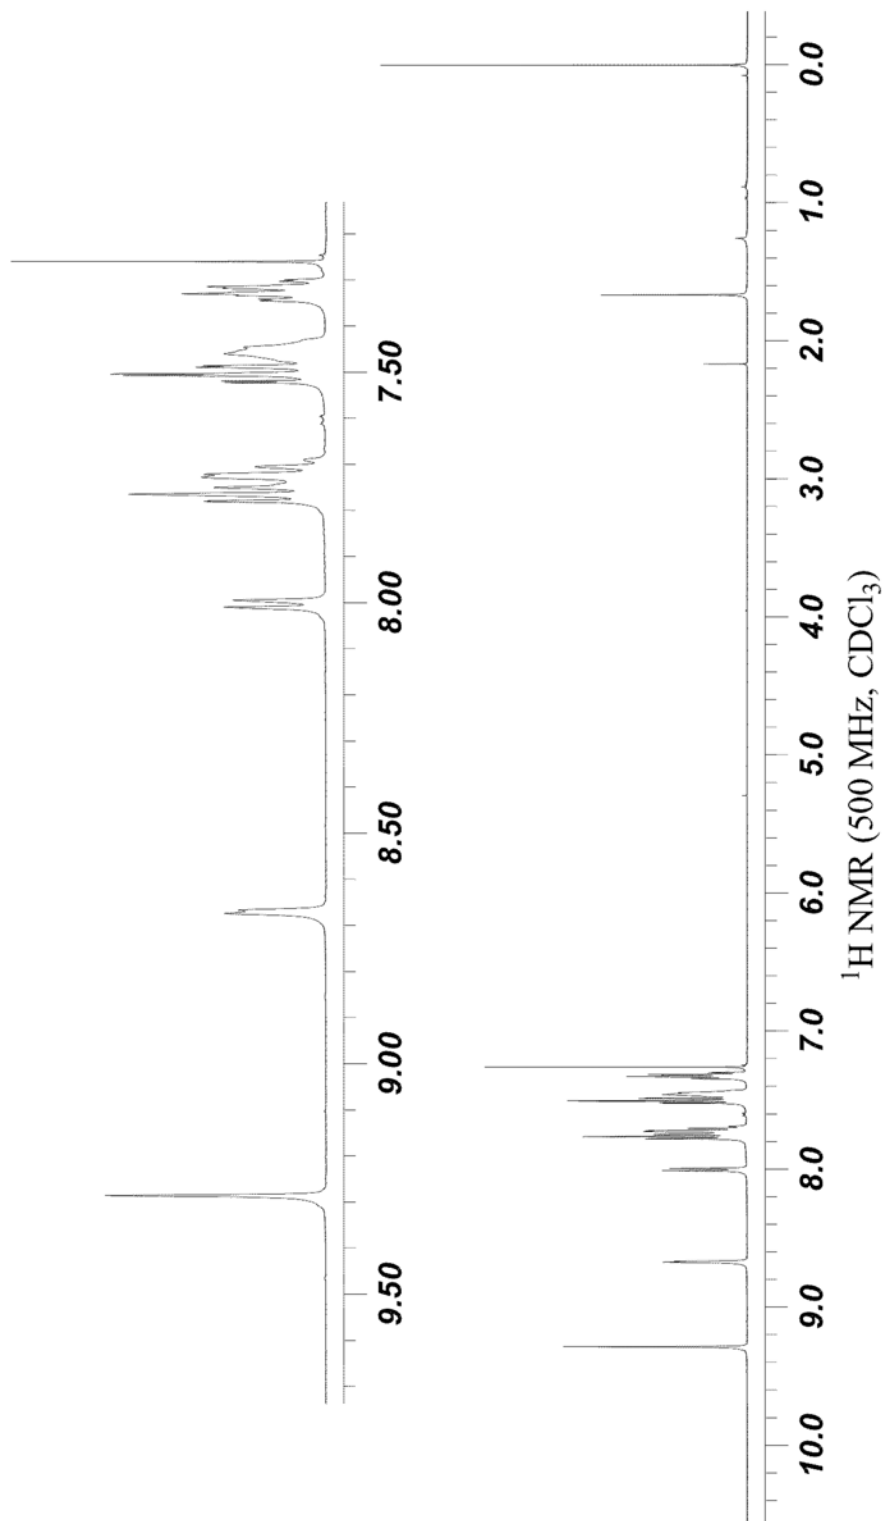

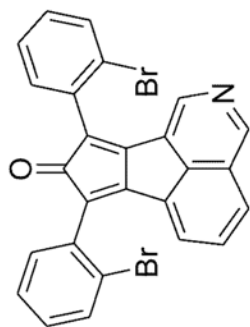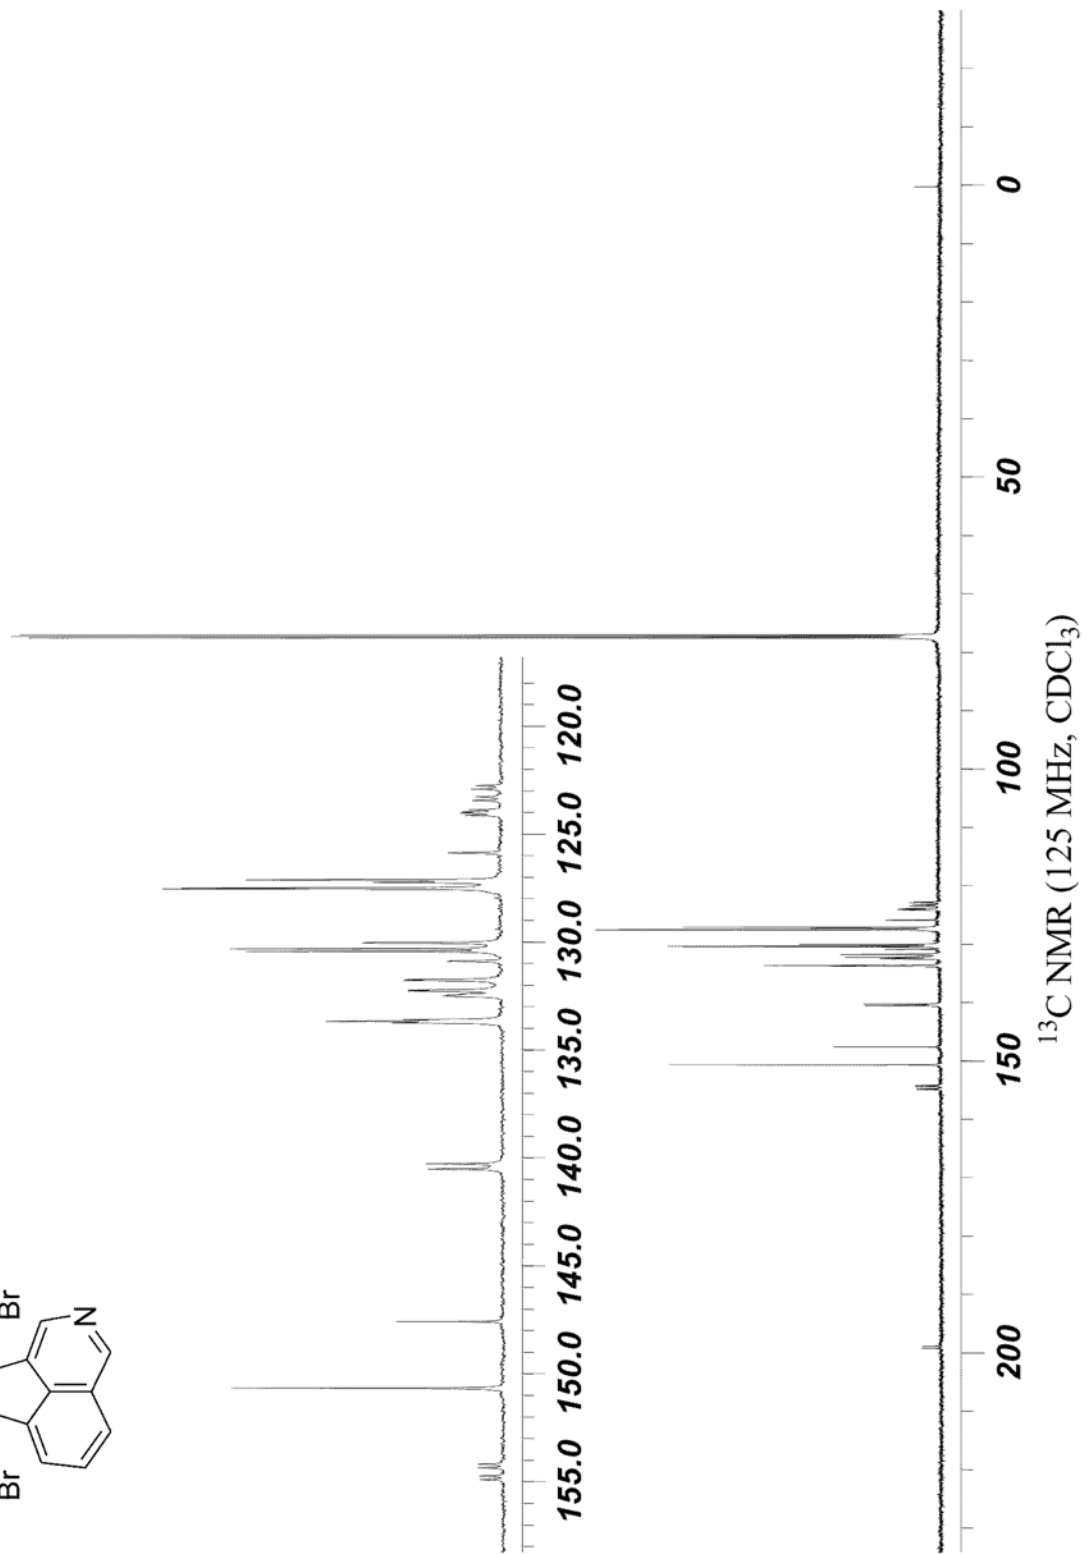

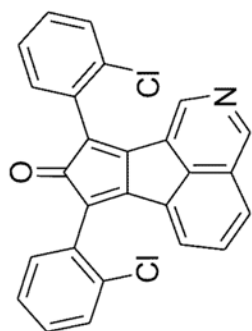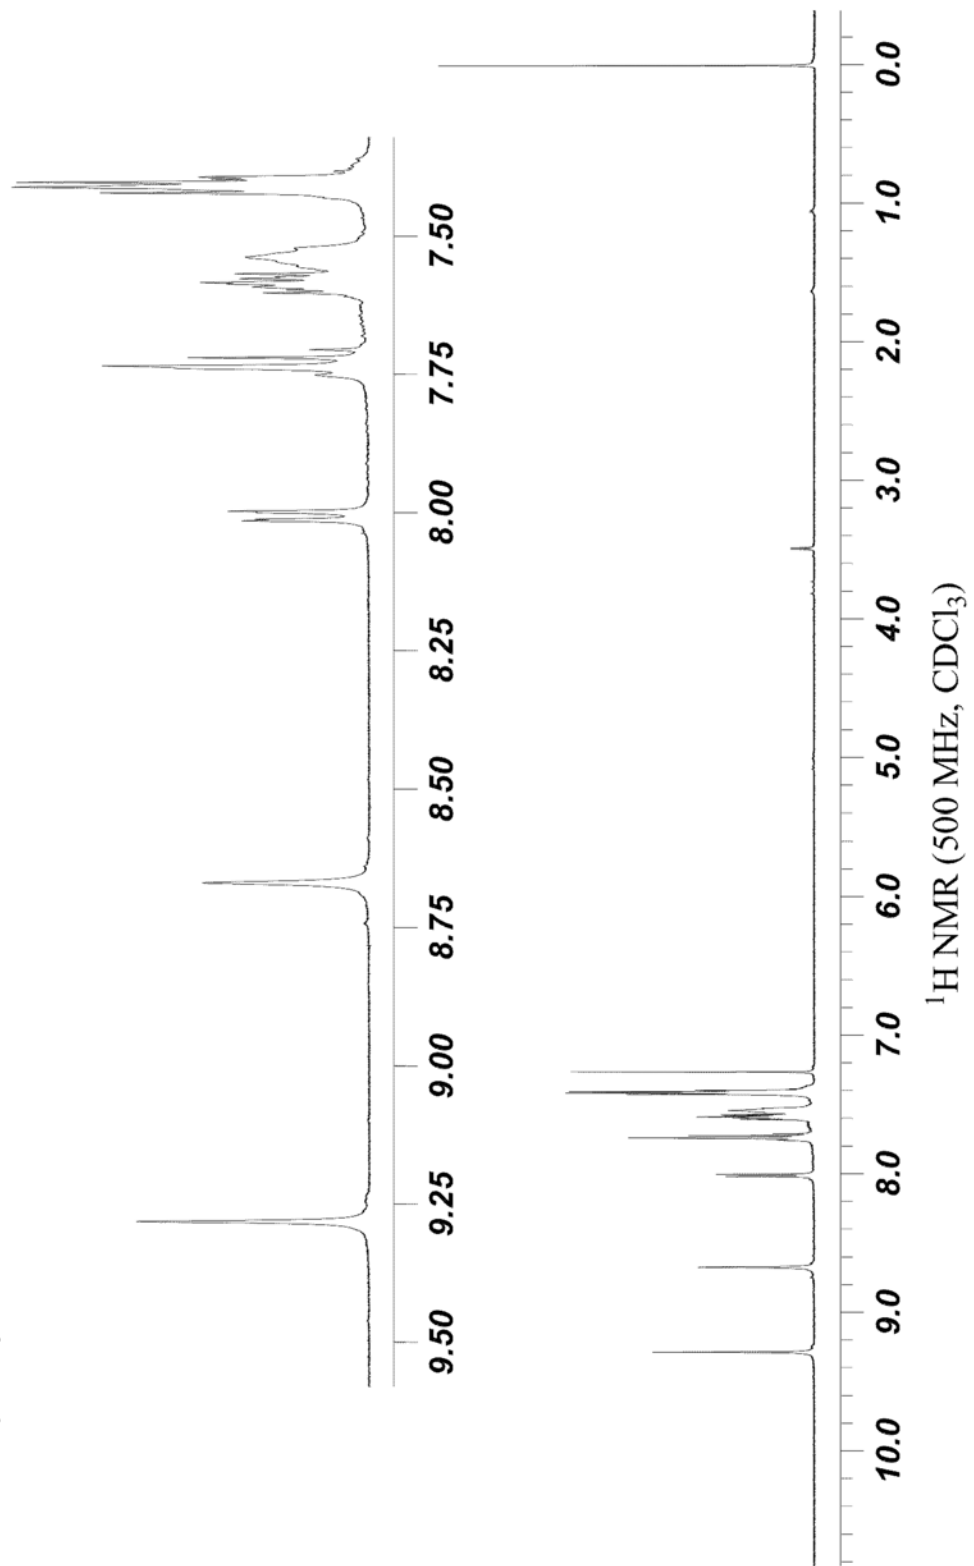

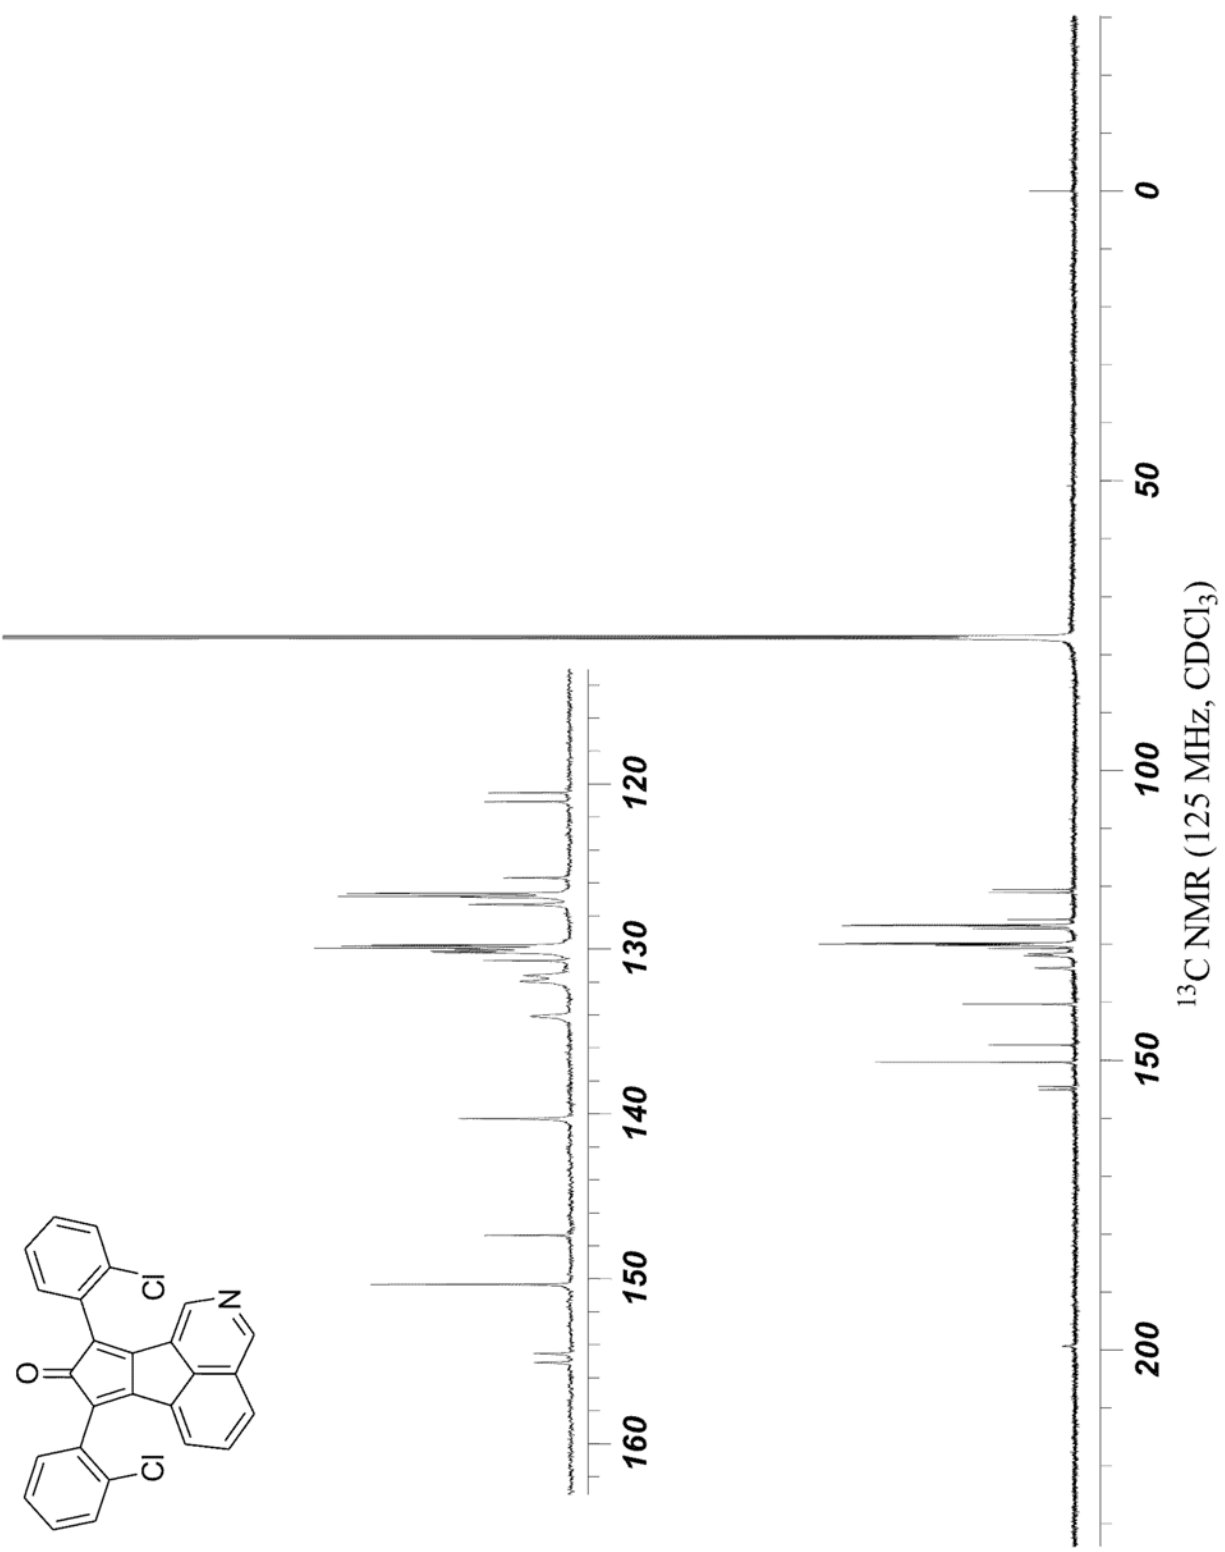

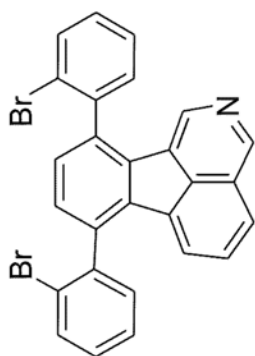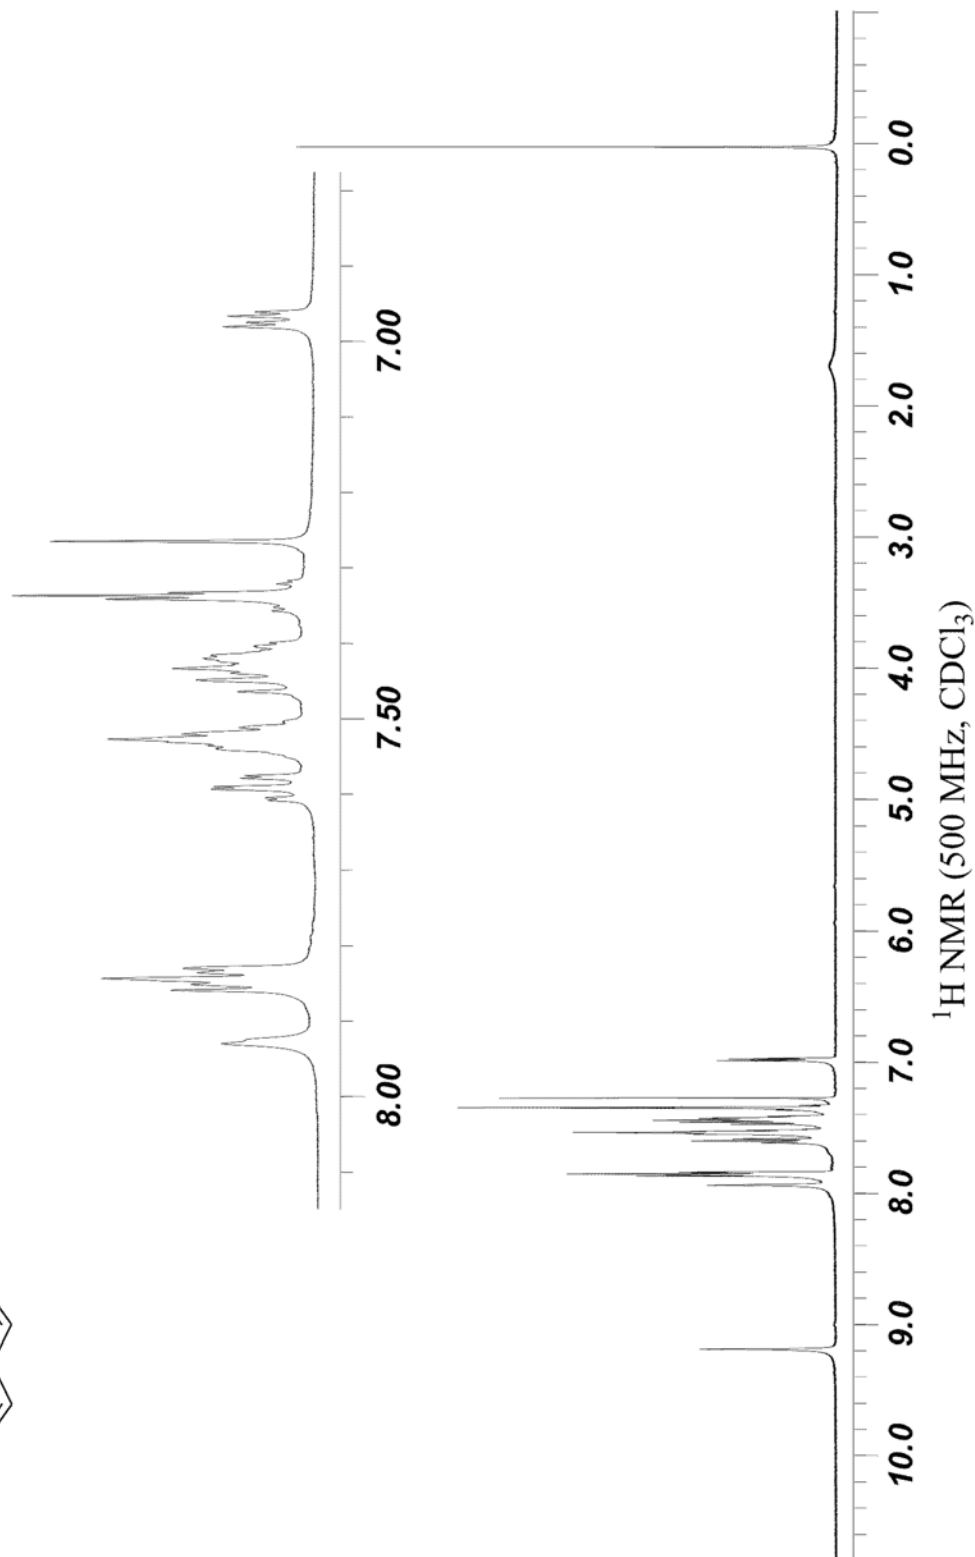



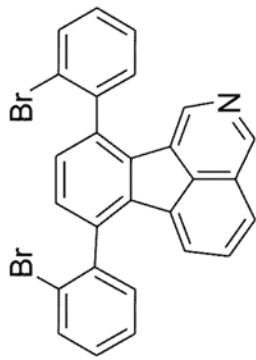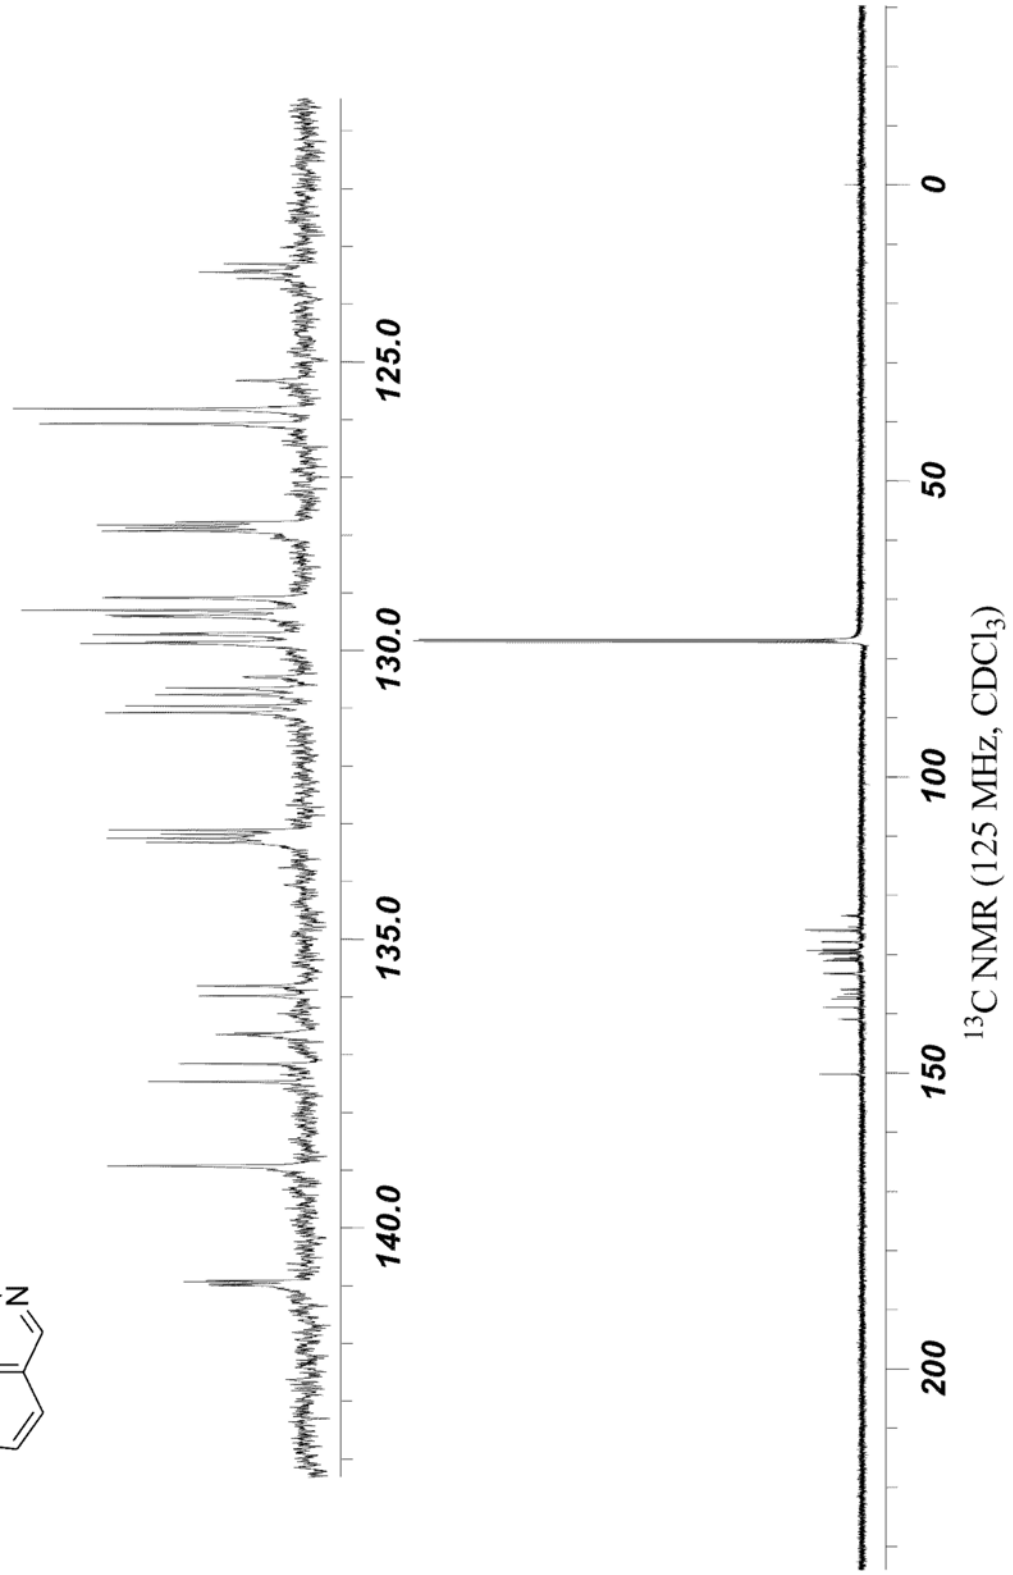

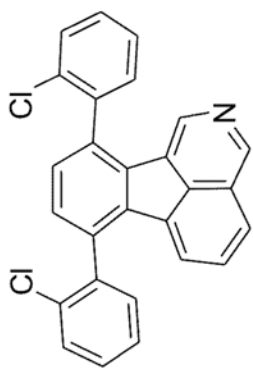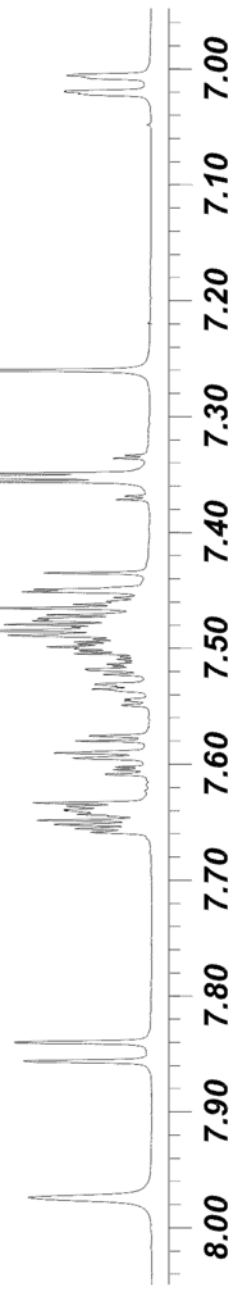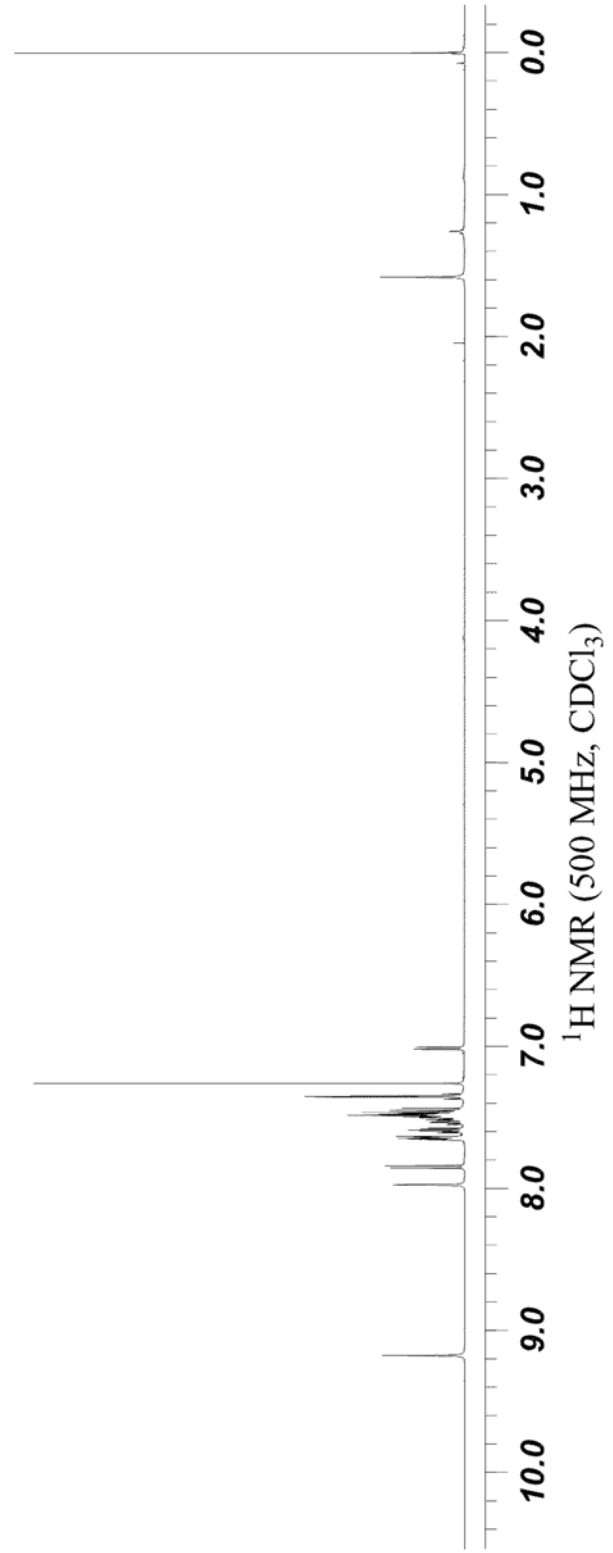

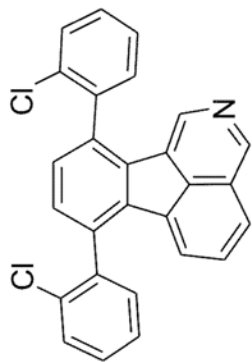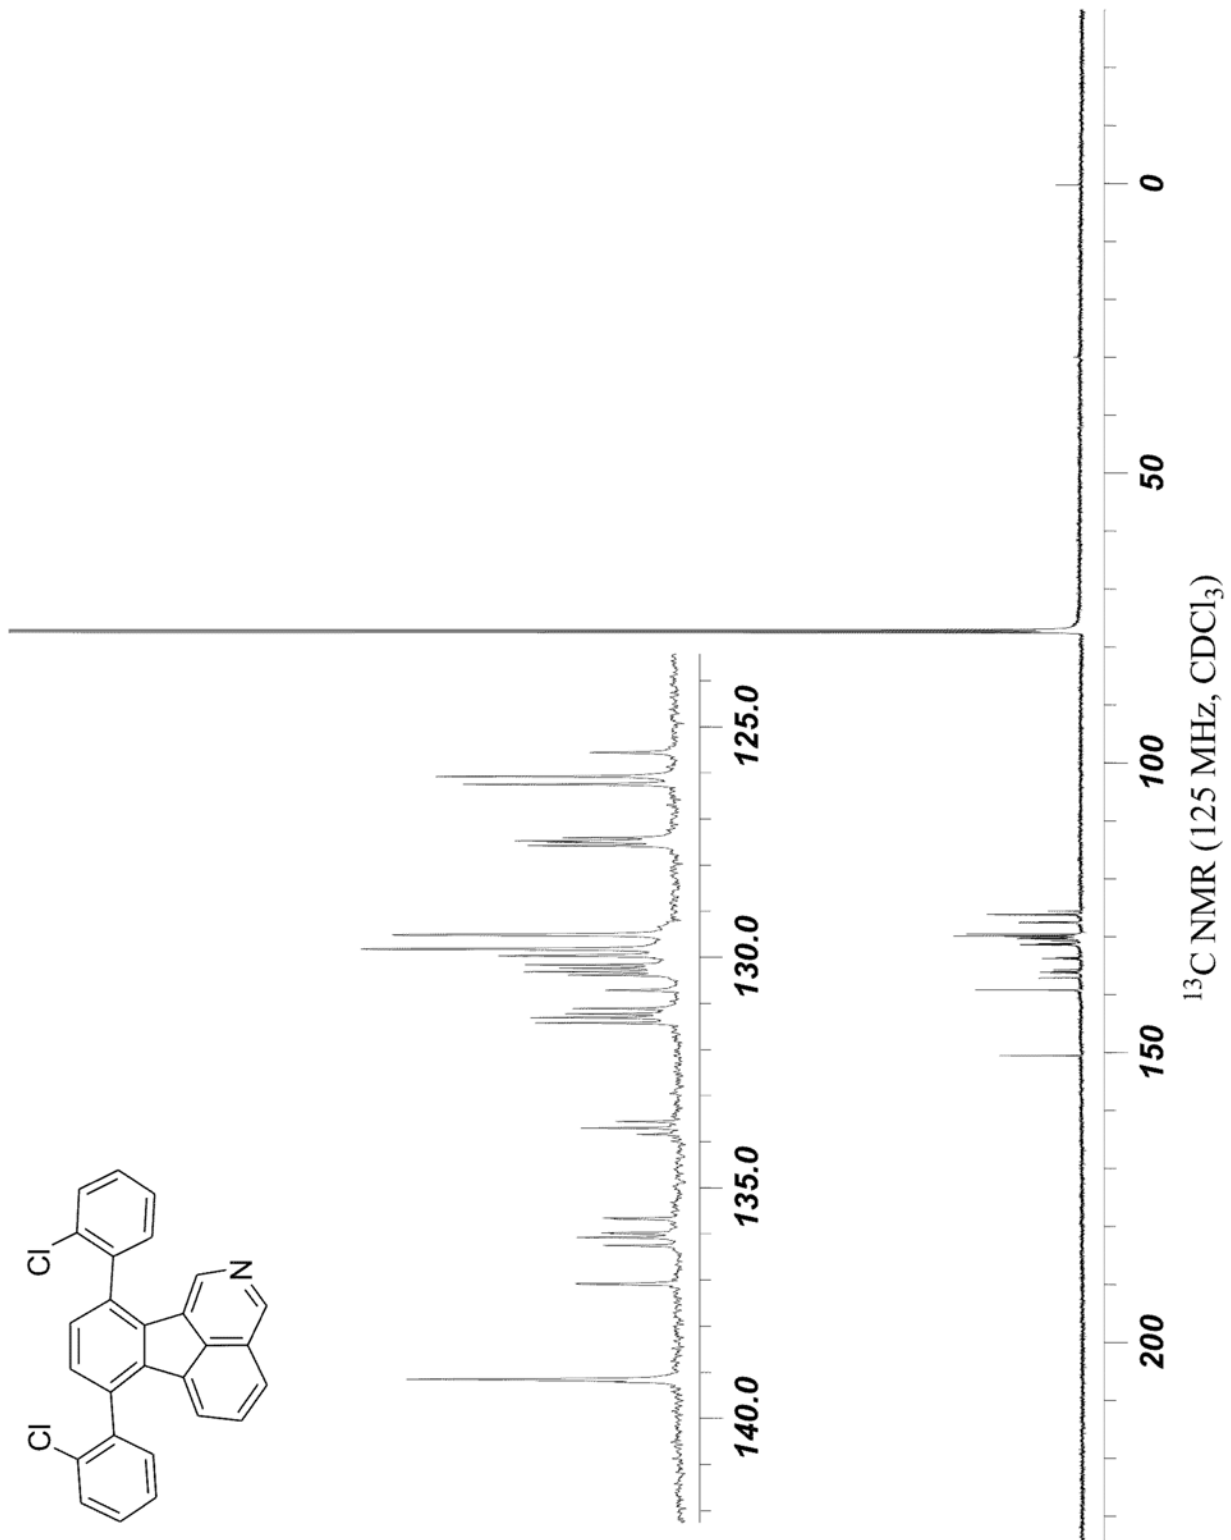

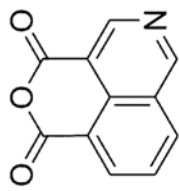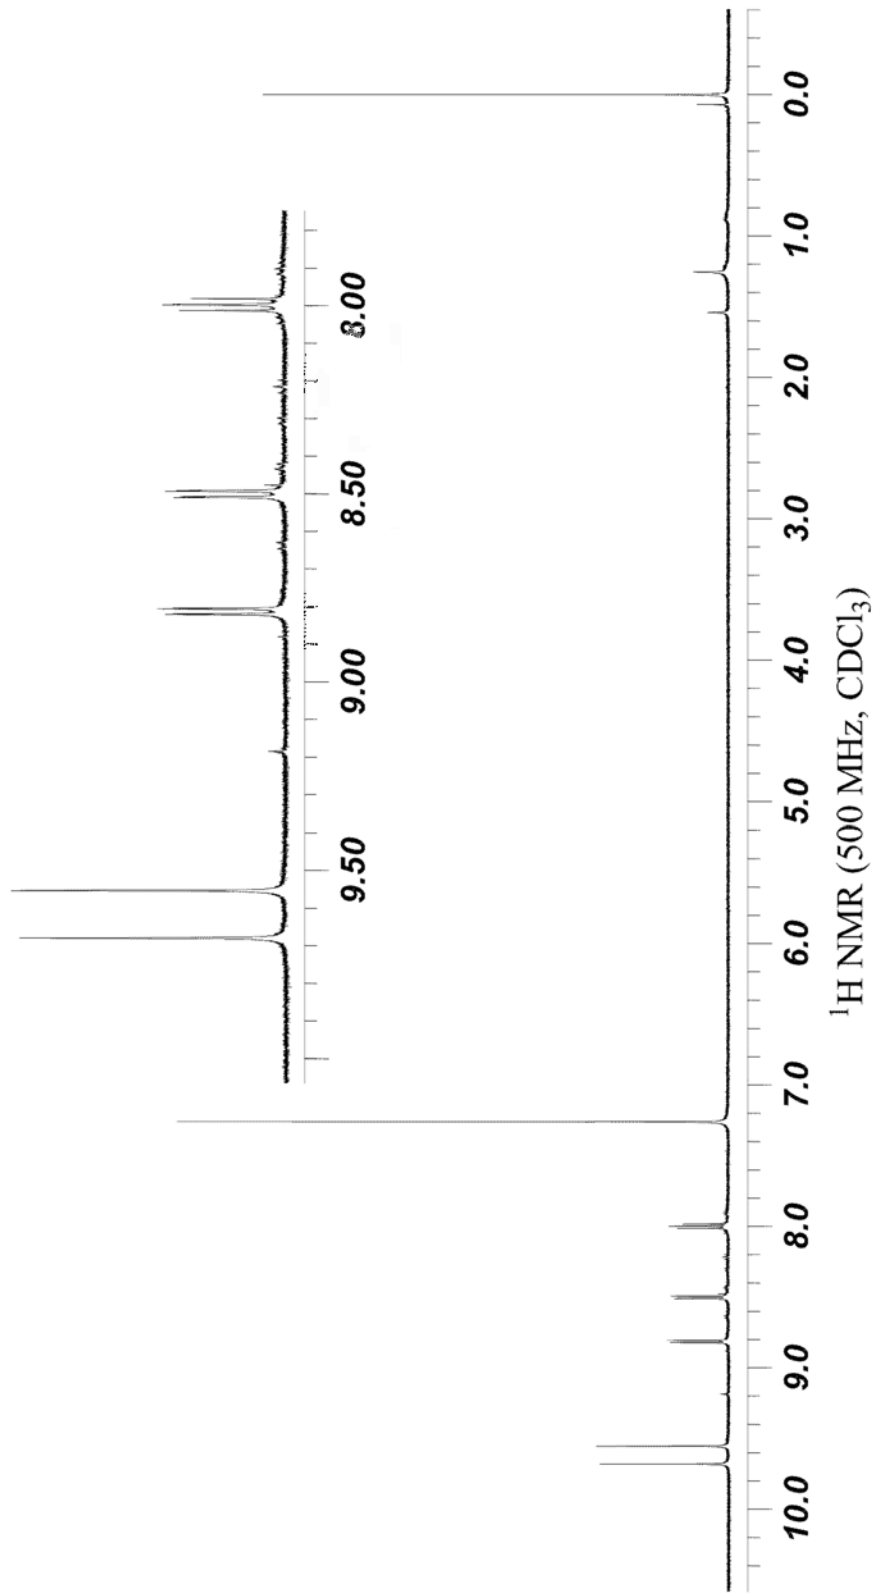

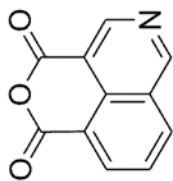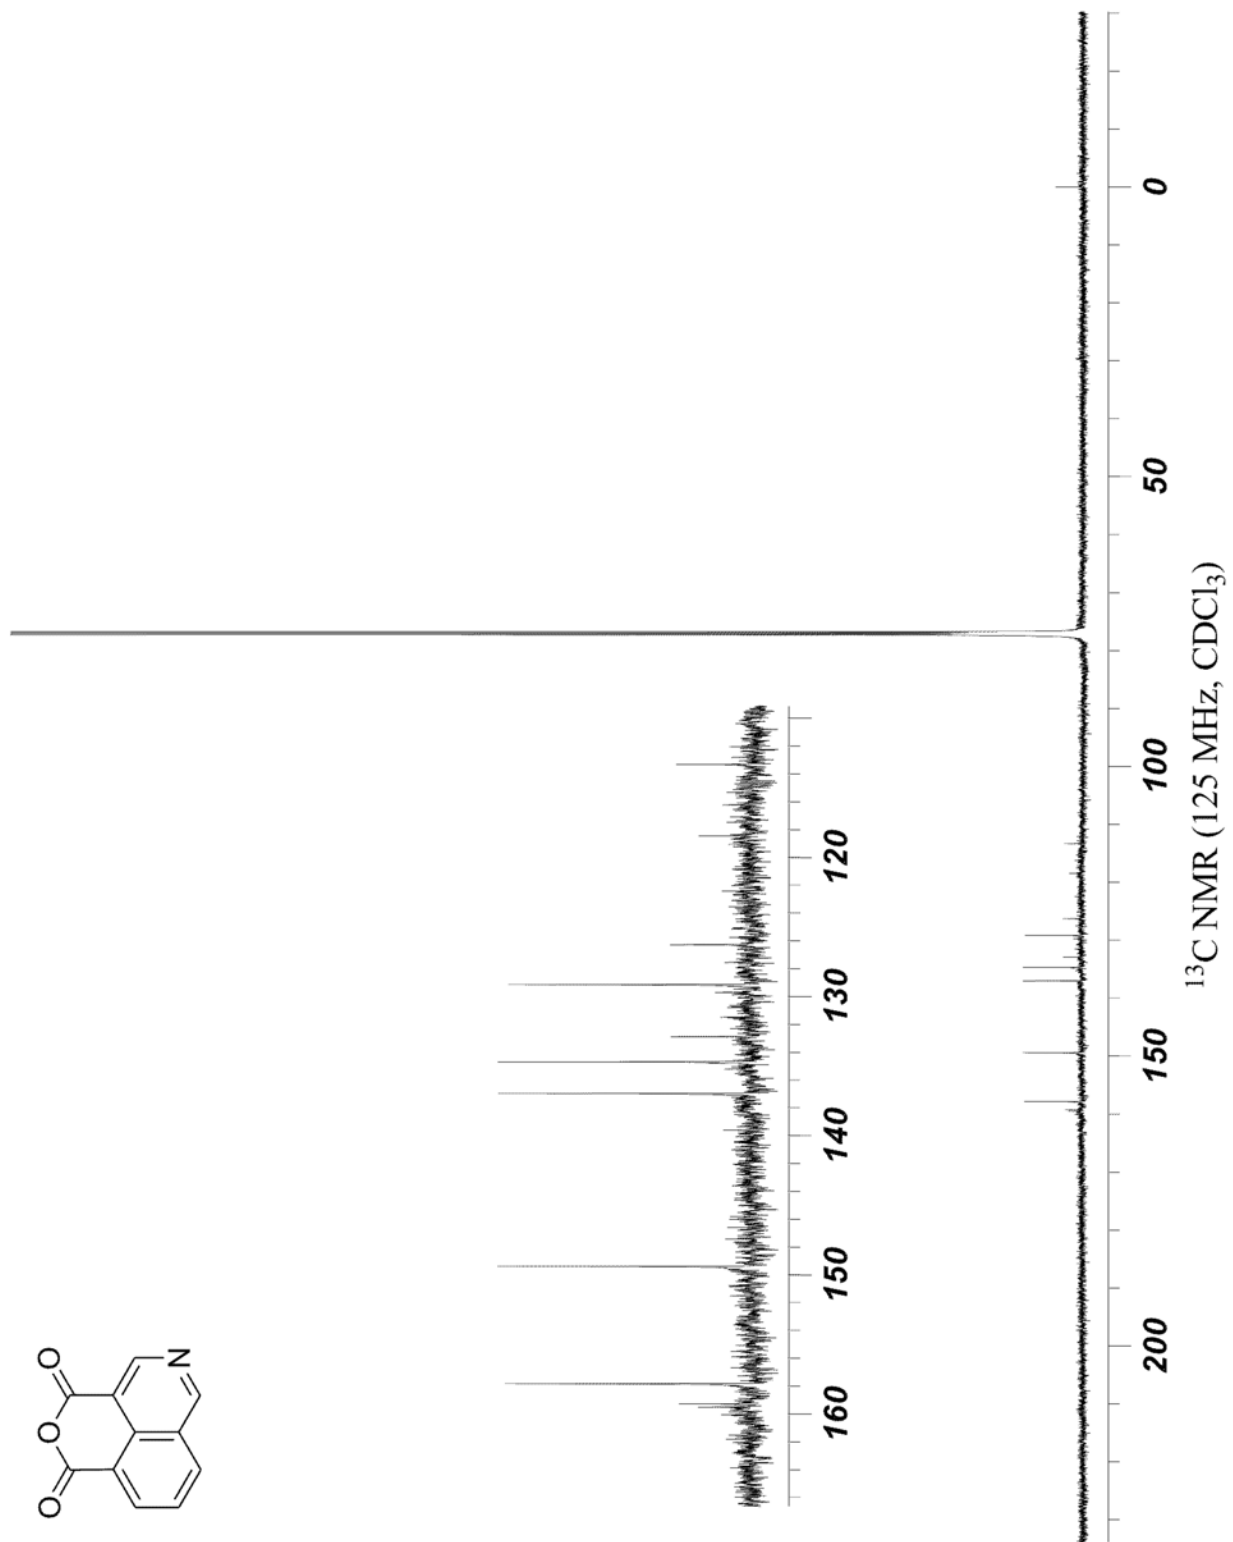

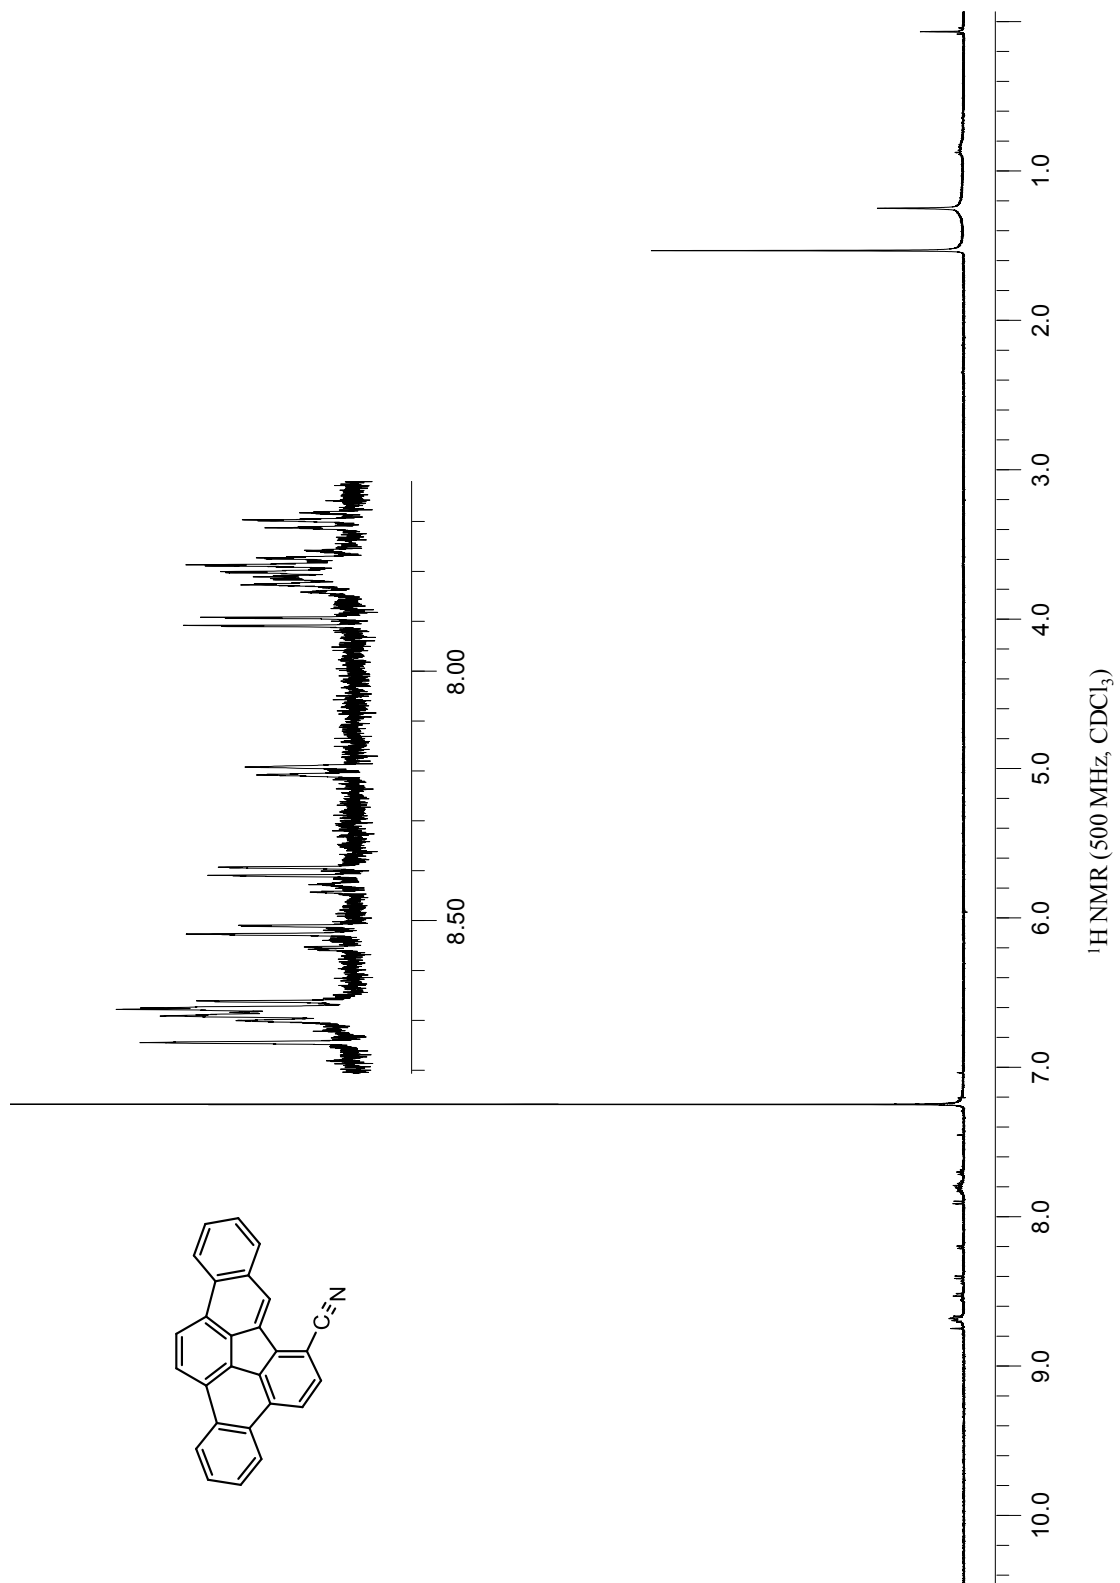

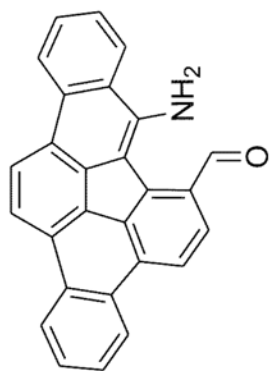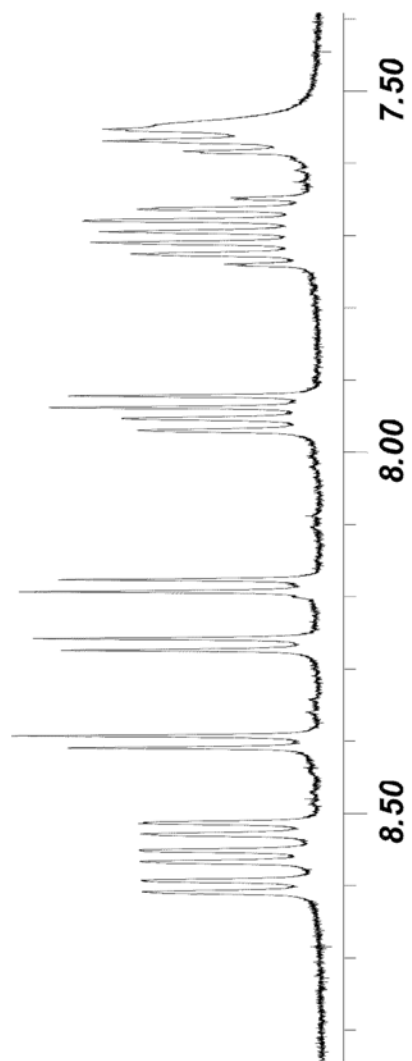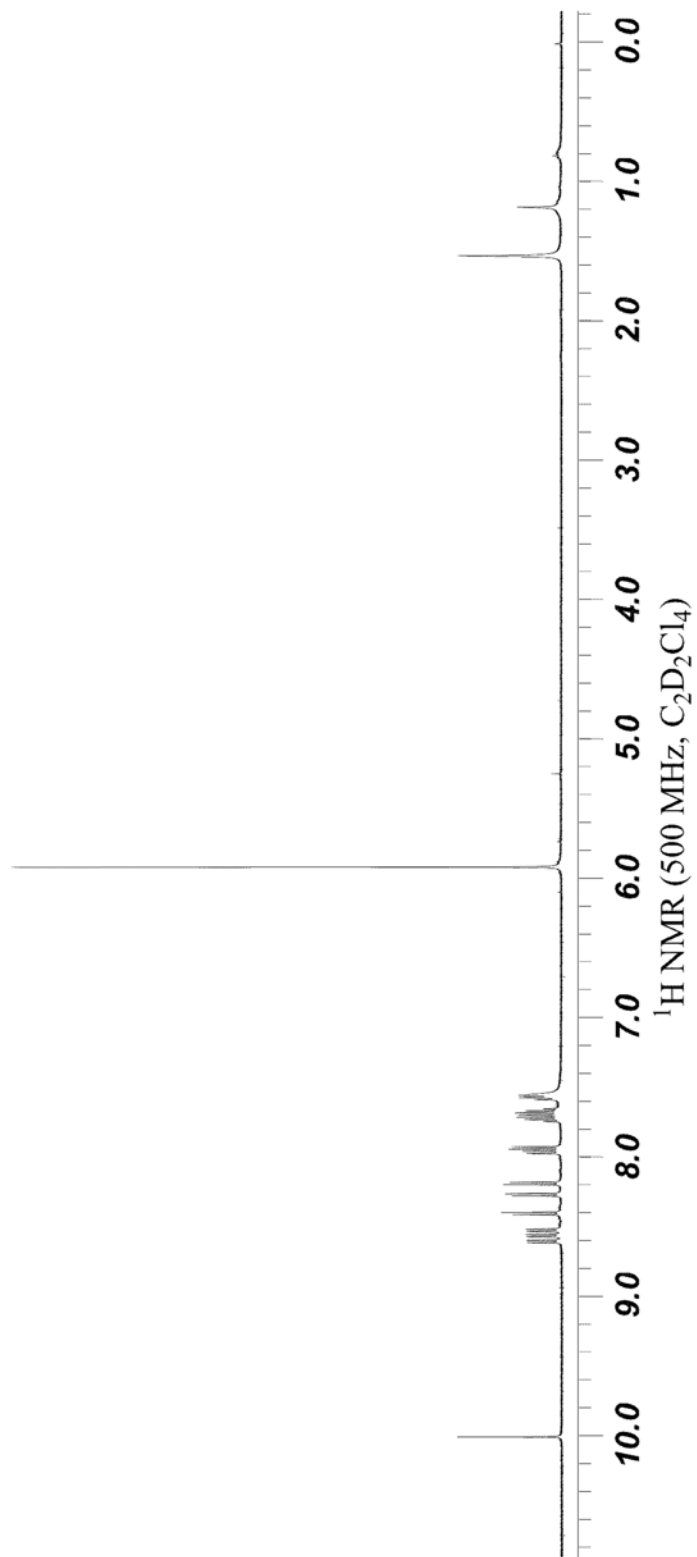

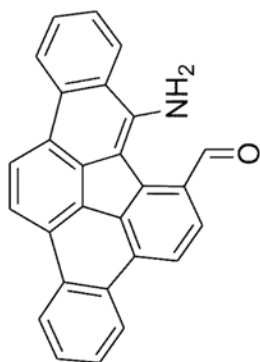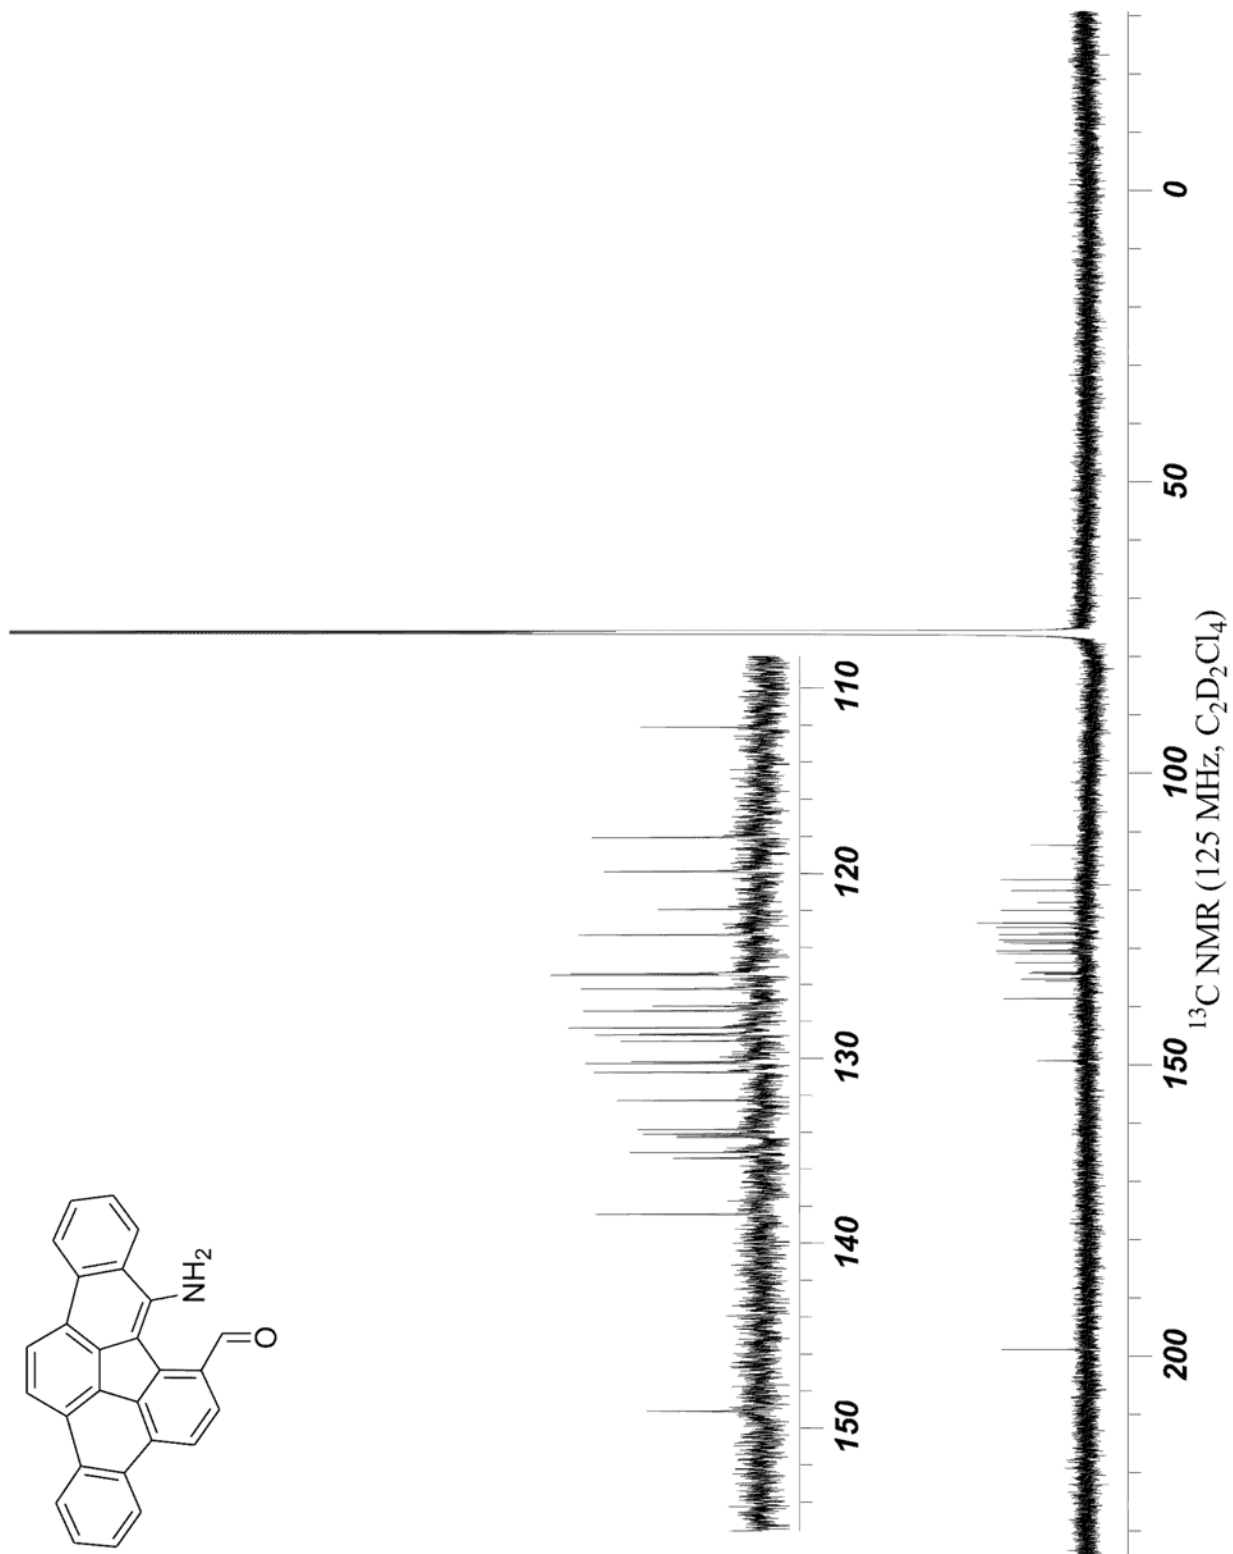



# UV Spectrum Aminoaldehyde

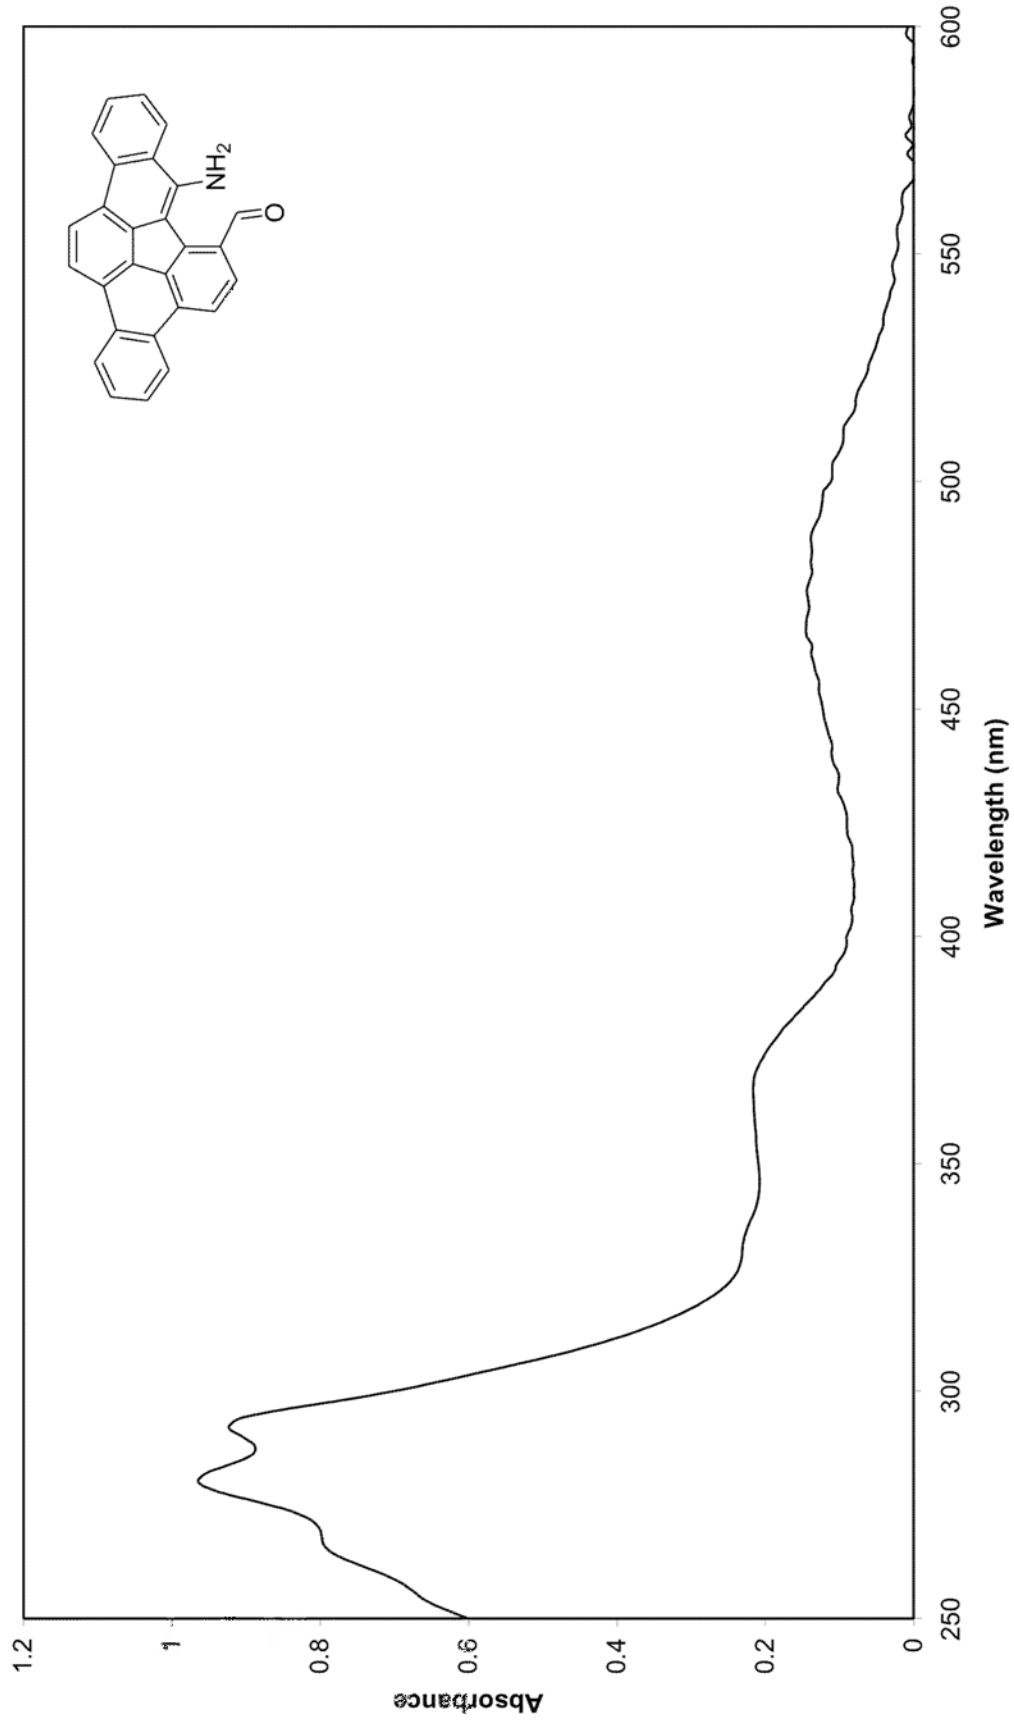

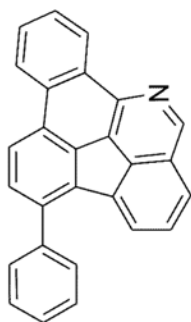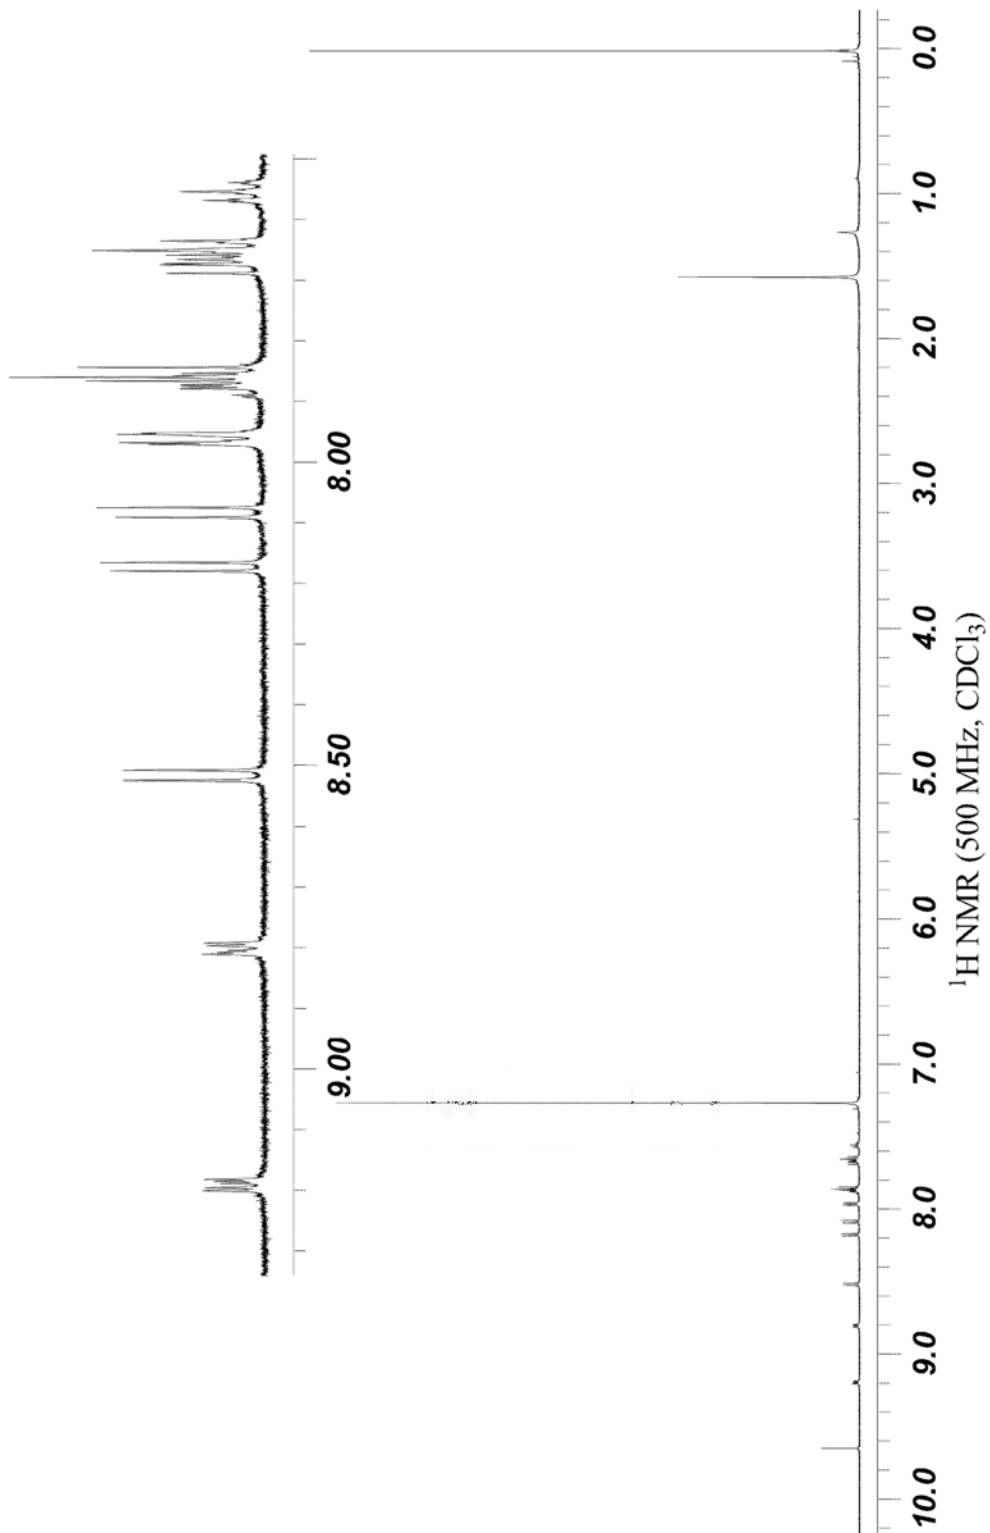

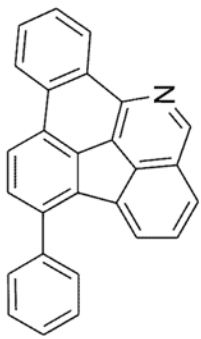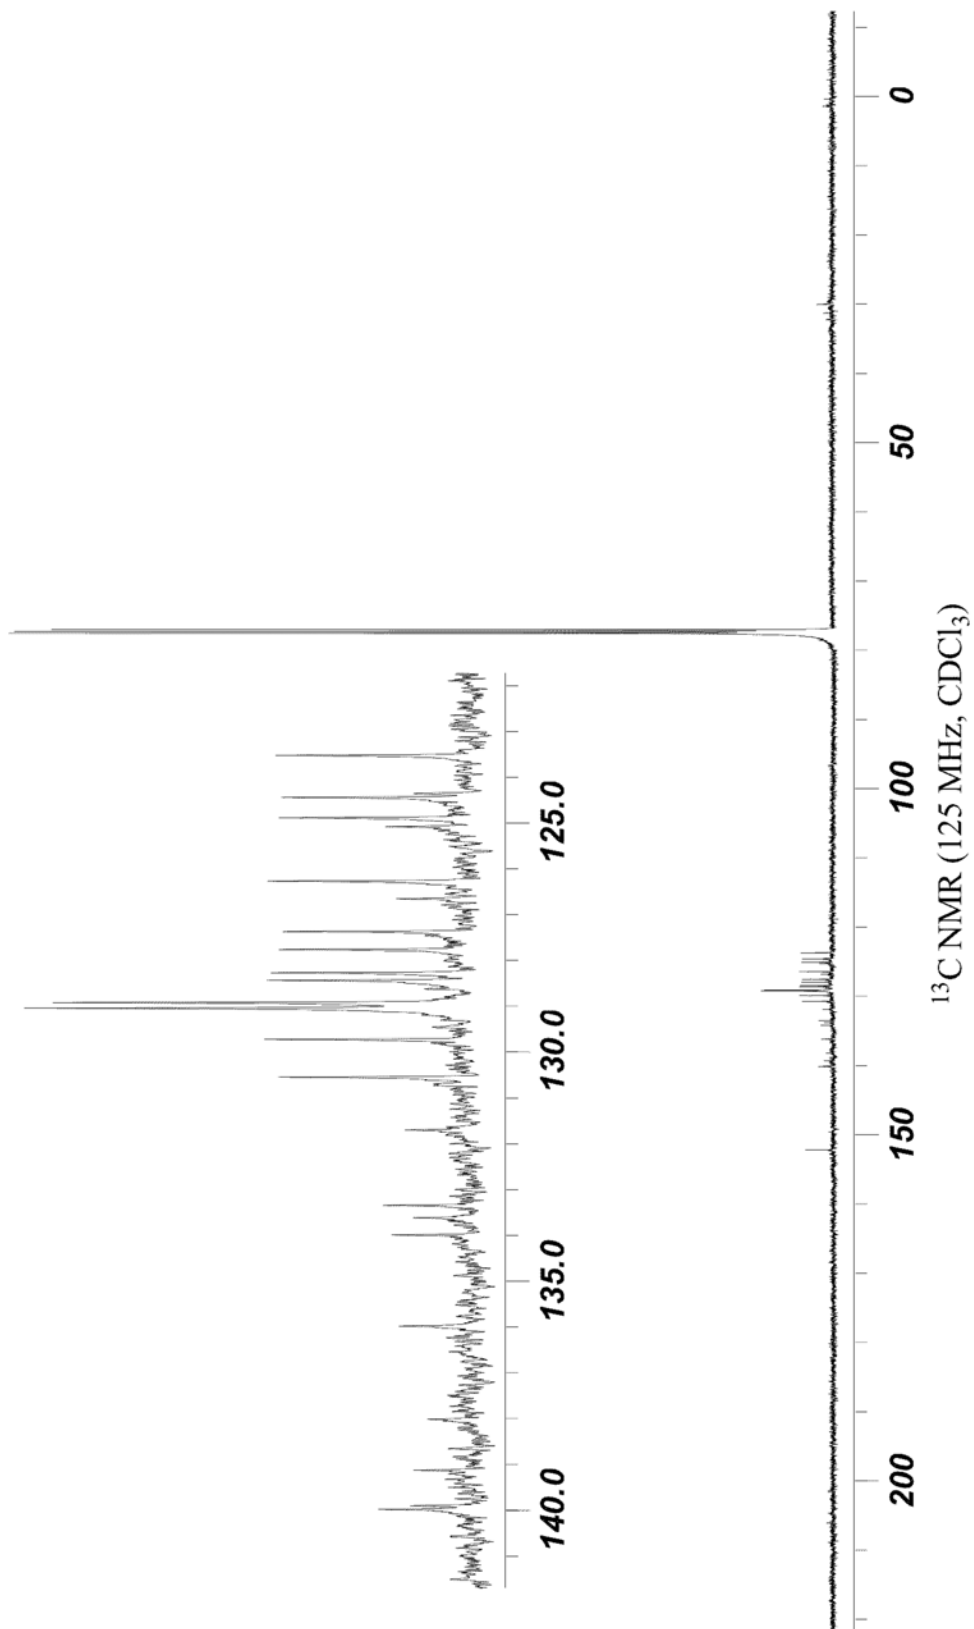

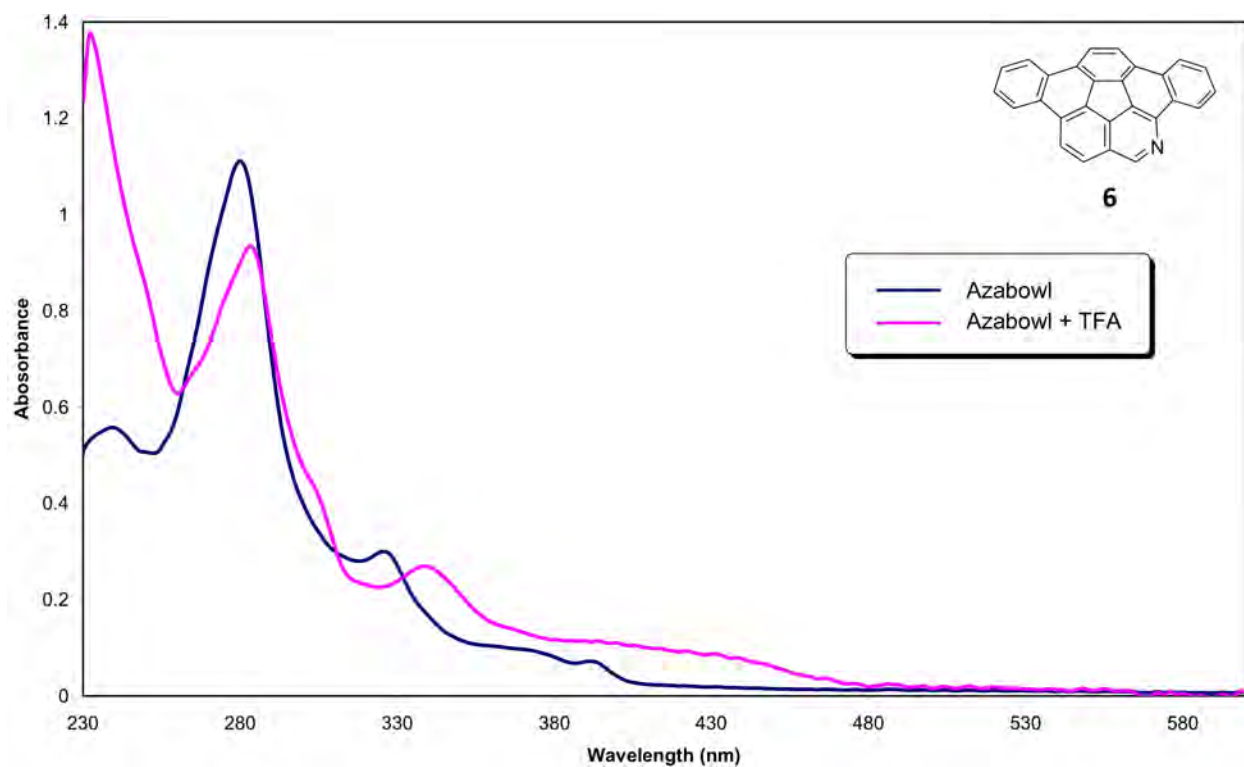

**Figure ESI 1.** UV-VIS spectra ( $\text{CH}_2\text{Cl}_2$ ) of 5-azadibenzo[*a,g*]corannulene (**6**) before and after addition of trifluoroacetic acid.

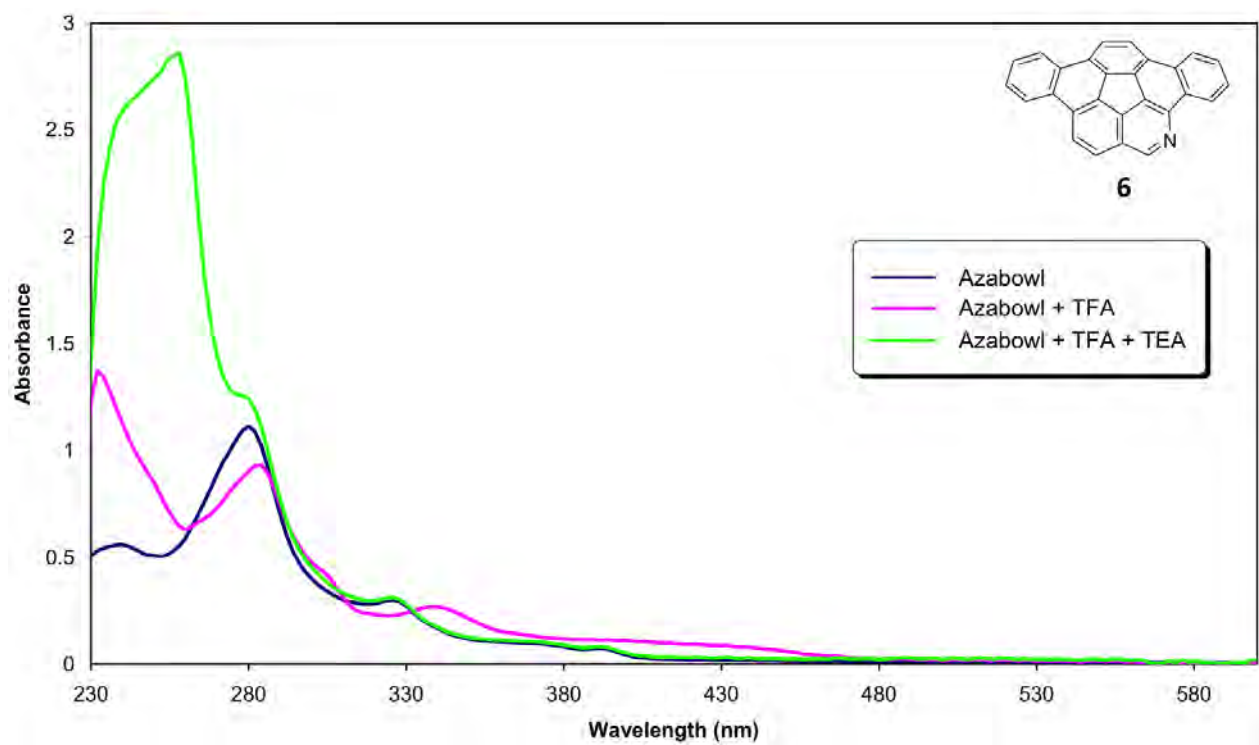

**Figure ESI 2.** UV-VIS spectra ( $\text{CH}_2\text{Cl}_2$ ) of 5-azadibenzo[*a,g*]corannulene (**6**), neutralized with triethylamine after addition of trifluoroacetic acid.
